1 Lateral Line Ablation by Ototoxic Compounds Results in Distinct Rheotaxis Profiles in Larval

2 Zebrafish

3

4 Kyle C Newton<sup>1,5\*</sup>, Dovi Kacev<sup>2</sup>, Simon R O Nilsson<sup>3</sup>, Allison L Saettele<sup>1</sup>, Sam A Golden<sup>3</sup>, and

5 Lavinia Sheets<sup>1,4\*</sup>

6

7 <sup>1</sup> Department of Otolaryngology, Washington University School of Medicine, St. Louis, MO, USA

8 <sup>2</sup> Scripps Institution of Oceanography, University of California San Diego, La Jolla, CA, USA

9 <sup>3</sup> Department of Biological Structure, University of Washington, Seattle, WA, USA

10 <sup>4</sup> Department of Developmental Biology, Washington University School of Medicine, St. Louis,  
11 MO, USA

12

13 **\* Correspondence:**

14 Kyle C Newton (kylecnewton@gmail.com; kyle.newton@oregonstate.edu)

15 <sup>5</sup> K C Newton's current affiliation: Department of Fisheries, Wildlife and Conservation Sciences,  
16 Coastal Oregon Marine Experiment Station, Oregon State University, Hatfield Marine Science  
17 Center, Newport, OR, USA

18

19 Lavinia Sheets (sheetsl@wustl.edu)

20

21 Keywords: zebrafish, lateral line, neuromast, sensory hair cell, rheotaxis, pose estimation,

22 animal tracking, behavior classification, behavioral profile, machine learning, machine vision

## 23 **ABSTRACT**

24           The zebrafish lateral line is an established model for hair cell organ damage, yet few  
25 studies link mechanistic disruptions to changes in biologically relevant behavior. We used larval  
26 zebrafish to determine how damage via ototoxic compounds impact rheotaxis. Larvae were  
27 treated with CuSO<sub>4</sub> or neomycin to disrupt lateral line function then exposed to water flow  
28 stimuli. Their swimming behavior was recorded on video then DeepLabCut and SimBA software  
29 were used to track movements and classify rheotaxis behavior, respectively. Lateral line-  
30 disrupted fish performed rheotaxis, but they swam greater distances, for shorter durations, and  
31 with greater angular variance than controls. Furthermore, spectral decomposition analyses  
32 confirmed that lesioned fish exhibited ototoxic compound-specific behavioral profiles with  
33 distinct changes in the magnitude, frequency, and cross-correlation between fluctuations in  
34 linear and angular movements. Our observations demonstrate that lateral line input is needed  
35 for fish to hold their station in flow efficiently and reveals that commonly used lesion methods  
36 have unique effects on rheotaxis behavior.

37

## 38 **INTRODUCTION**

39           The lateral line is a sensory system used by fishes and amphibians to detect water flow.  
40 The functional units of the lateral line are neuromasts; bundles of sensory hair cells located  
41 externally along the head and body that mechanotransduce low frequency ( $\leq 200$  Hz) water flow  
42 stimuli into electrochemical signals for interpretation by the central nervous system (reviewed in  
43 <sup>1</sup>). The lateral line is known to partially mediate rheotaxis, a multimodal behavior (<sup>2</sup>) that  
44 integrates input from visual (<sup>3, 4, 5</sup>), vestibular (<sup>6, 7</sup>), tactile (<sup>3, 8, 9, 10</sup>), and lateral line systems (<sup>9,</sup>  
45 <sup>10, 8</sup>) to facilitate fish orientation and movement of fish with respect to water flow (<sup>9, 10</sup>).

46           Although the contribution from the lateral line is well established, there is conflicting  
47 evidence on whether it is essential for rheotaxis in fish (<sup>2, 5, 9, 10, 11, 12</sup>). Inconsistent  
48 methodologies used on distinct fish species that differentially rely on the lateral line to mediate

49 swimming behaviors obfuscate the relationship between the lateral line and rheotaxis. In  
50 addition, a recent review hypothesized that differences in the spatial characteristics and velocity  
51 of the flow stimuli used to assay rheotaxis likely resulted in the disparate results reported in  
52 these studies (see Table 1 in <sup>13</sup>).

53 Zebrafish hair cells demonstrate unique regenerative features that make them an  
54 important model for hearing loss research (<sup>14, 15, 16, 17, 18, 19</sup>). Many studies have focused on  
55 mechanistic disruption of hair cell activity, but few have explored the association between  
56 disruption and hair cell mediated behavior. Previous researchers have developed several  
57 different assays to study rheotaxis in larval fishes (e.g., <sup>5, 20, 21, 22</sup>). However, we sought to  
58 develop a behavioral assay and analytical methodology that is sensitive, spatiotemporally  
59 scalable, and robust enough to be used on a variety of species, ontogenetic stages, sensory  
60 modalities, and behavioral responses that are pertinent to biomedical and ecological research.

61 We therefore investigated how the lateral line contributes to rheotaxis in larval zebrafish  
62 and developed a standardized assay that could identify subtle differences in rheotaxis behavior  
63 (<sup>12</sup>). We compared the rheotaxis response of fish with an intact lateral line to those with lateral  
64 line hair cells ablated by two commonly used compounds: copper sulfate ( $\text{CuSO}_4$ ; <sup>17, 23, 24, 25</sup>)  
65 and neomycin (<sup>5, 15, 26</sup>). We hypothesized that different ototoxic compounds might produce  
66 distinct changes in rheotaxis behavior because they injure lateral lines via different cellular  
67 mechanisms (<sup>27</sup>), and that these behavioral changes could be empirically quantified using  
68 machine vision and learning technology.

69

## 70 **RESULTS & DISCUSSION**

71 To determine the contribution of the lateral line to rheotaxis in fishes, we used  $\text{CuSO}_4$   
72 and neomycin to ablate the lateral line neuromasts of larval zebrafish (6-7 days post-fertilization  
73 (dpf)), then video recorded the swimming behavior of individual larvae in a microflume under no-

74 flow and flow stimulus conditions (Fig. 1). Our procedures eliminated visual and linear  
75 acceleration cues (see methods) and young larval zebrafish cannot detect horizontal angular

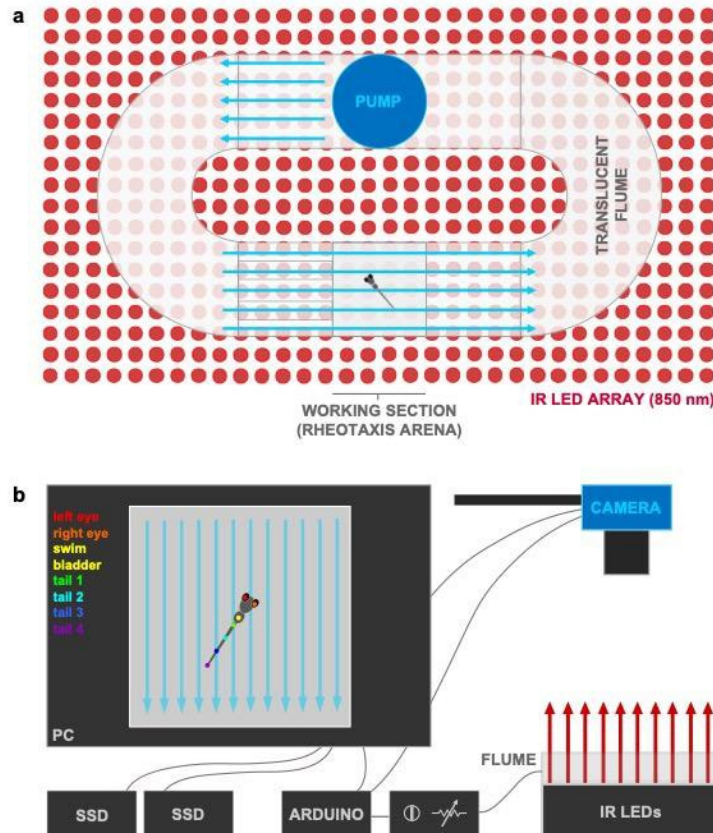

76  
77 **Figure 1. Experimental microflume used to conduct rheotaxis assays under IR illumination.** a) The microflume (220 x 100 x  
78 40 mm) with a removeable working section (30 x 30 x 10 mm) was 3D printed from translucent resin and placed on top of an  
79 infrared (850 nm) LED array. b) Schematic of experimental set-up. The IR light passed through the flume and the overhead camera  
80 recorded rheotaxis trials at either 200 or 60 fps onto SD cards. The timing and duration for the camera and flume pump onset and  
81 offset of was controlled by an Arduino and pump voltage (i.e., water flow velocity =  $9.74 \text{ mm s}^{-1}$ ) was controlled by a rheostat. Each  
82 trial was monitored via the live camera feed displayed on the PC and all videos were copied in duplicate onto a 12TB RAID array.  
83 Dots on fish larva indicate seven body positions tracked by DeepLabCut.

84  
85 velocity cues (i.e., yaw; <sup>31, 32</sup>); however, it was not possible to selectively block tactile cues in a  
86 non-invasive manner. To confirm ablation of lateral line neuromasts, a subset of all fish that had  
87 undergone behavioral testing were fixed, then proceed for immunolabeling of hair cells and

88 innervating afferent neurons (Fig. 2). We observed near total hair cell loss in both anterior and  
89 posterior lateral line neuromasts with  $\text{CuSO}_4$  treatment (Fig. 2 a, b, d, e, g) and a significant  
90 impact on the morphology and reduction in hair cell number per neuromast following neomycin  
91 treatment (Fig. 2 a, c, d, f, g). These results support that the ototoxic compound-treated fish  
92 used in our behavior assay had a total absence or severe impairment of lateral line function.  
93

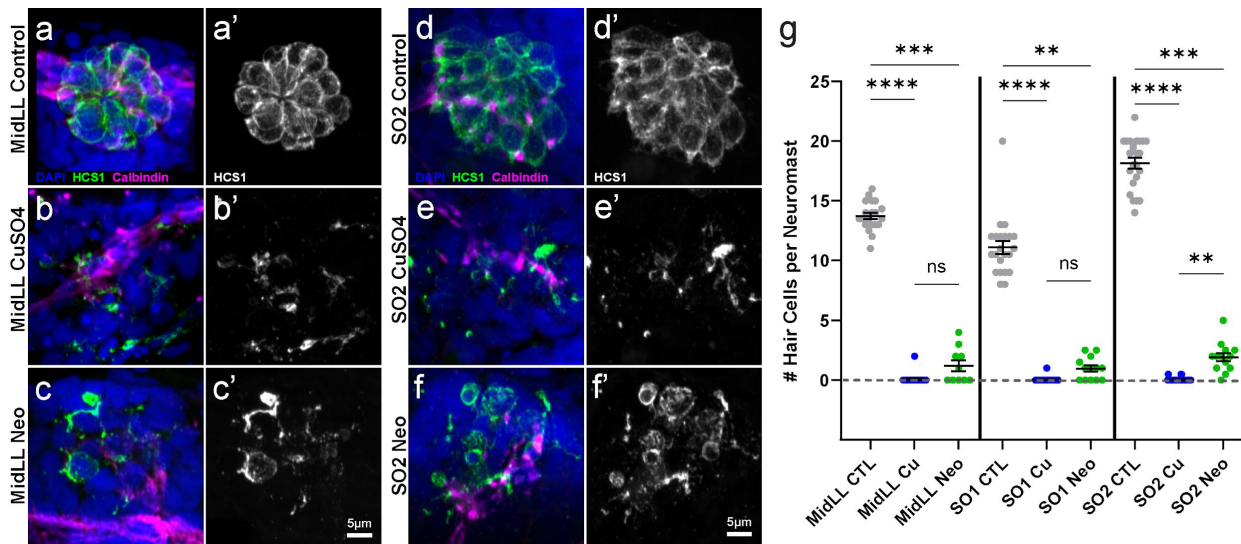

94  
95 **Figure 2. Confirmation of neuromast hair cell loss following  $\text{CuSO}_4$  or neomycin treatment.** a-f) Representative confocal max  
96 intensity projection images of the: a-c) mid posterior lateral line (MidLL) fourth neuromast (L4); and d-f) second anterior supraorbital  
97 (SO2) neuromast from the fish cohorts used for behavior experiments. Hair cells were labeled with an antibody against Otoferlin  
98 (HCS1; green a-f, gray a'-f'). Afferent neurons were labeled with an antibody against Calbindin (magenta), and cell nuclei were  
99 labeled with DAPI (blue). g) Quantification of the grand mean ( $\pm$  SEM) number of hair cells per neuromast in intact (CTL),  $\text{CuSO}_4$ -  
100 and neomycin-treated fish. Each dot represents the mean number of hair cells from the MidLL (L3, L4, and L5) or SO (left and right)  
101 neuromasts from an individual fish. Data were collected from fish used in three experimental behavior trials; 4-6 fish per condition  
102 per trial. Significance values: \*\* < 0.01, \*\*\* < 0.001, \*\*\*\* < 0.0001

103

104 We used machine vision and learning software for 3D pose estimation, movement  
105 tracking, and annotation of videos for positive rheotaxis events (as defined in methods) when  
106 fish oriented toward ( $0^\circ \pm 45^\circ$ ) and actively swam into the oncoming flow (e.g., Supplementary  
107 Fig. 1). We standardized our analyses by comparing rheotaxis data acquired during flow to the

108 swimming behavior of fish when they were randomly oriented at  $0^\circ \pm 45^\circ$  under no flow (see  
109 data analysis). Under no flow conditions, we determined that each treatment group of fish was  
110 randomly distributed (Fig. 3; Supplementary Table 1) and had no natural proclivity to orient their  
111 bodies to  $0^\circ \pm 45^\circ$  (Supplementary Table S2).

112

### 113 *Lateral Line Ablation Alters but Does Not Eliminate Rheotaxis Behavior*

114 We predicted that fish treated with the minimum dosage of  $\text{CuSO}_4$  or neomycin  
115 necessary to ablate lateral line hair cells would not perform rheotaxis as well as control fish with  
116 an intact lateral line. Surprisingly, fish with lesioned lateral line organs could still orient into  
117 oncoming flow like control fish (Fig. 3; Supplementary Tables 1-2), indicating that the effects of  
118 ablation were subtle, and the lateral line was not essential for rheotaxis behavior.

119 By analyzing the kinematic components of rheotaxis movement, stark behavioral  
120 changes were observed among lesioned fish. Comparisons between lateral line-ablated and  
121 control groups showed significant differences in the mean body angle or angular variance (Fig.  
122 3, Supplementary Table 3), mean duration of rheotaxis events, mean number of rheotaxis  
123 events, total distance traveled, and latency to the onset of rheotaxis (Fig. 4, Supplementary  
124 Tables 4-7). These observations demonstrate that rheotaxis occurs but is altered in lateral line-  
125 ablated groups, which contrasts with previous reports on larval zebrafish (<sup>5, 22, 28</sup>) and supports  
126 the idea that the lateral line is not required for rheotaxis in fishes (<sup>2, 11, 12, 29, 30</sup>).

127 We posit that our focus on acute rheotaxis behavior (~20 s) and the fine scale  
128 spatiotemporal sampling of machine vision technology allowed us to detect subtle changes in  
129 behavior that were overlooked in previous rheotaxis studies (<sup>2, 5, 12, 29, 30</sup>). Our methods  
130 eliminated turbulent water flow, optic flow (<sup>3</sup>), and certain vestibular cues (yaw: <sup>31, 32</sup>; linear  
131 acceleration). However, we did not eliminate tactile cues because we could not prevent fish  
132 from contacting the substrate and our flow rate was sufficient to displace substrate coupled fish  
133 along the bottom and against the rear mesh of arena. Therefore, we propose that lateral line

134 ablated fish might have used tactile cues to gain an external frame of reference and perform  
135 rheotaxis (<sup>8, 10</sup>), but explicitly testing this idea would require designing an experimental  
136 apparatus that enables the video capture of fish movements along the vertical plane (Z-axis),  
137 which is not possible in our translucent micro flume.

138

### 139 *Ototoxic Compounds Differentially Influence the Distribution of Mean Body Angles During Flow*

140 To identify differences in body orientation, the mean body angle for fish in the presence  
141 or absence of flow stimuli were compared among treatment groups (Fig. 3). Since flow  
142 originated at the top of the flume (located at 0°), mean body angle was determined relative to  
143 that of the oncoming water stimulus. The angular variance of each group is represented by the  
144 inverse of the mean length of the resultant vector (i.e., short vectors = high variance, and vice  
145 versa; Fig. 3). Under no flow, fish from each treatment group swam with a random orientation,  
146 indicated by a grand mean body angle that was statistically different from 0° and length of the  
147 resultant vector close to zero (Fig. 3a, Supplementary Table 2). When flow was applied, all  
148 groups exhibited significant alignment into the oncoming flow stimulus because the grand mean  
149 body angles were clustered at 0° and length of the resultant vectors were close to one (Fig. 3b-  
150 c).

151 During rheotaxis, post-hoc comparisons within treatment groups showed a significant  
152 difference in the homogeneity of distributions between initial and final portions of the flow  
153 stimulus, indicating that overall orientation behavior within groups was not consistent for the  
154 duration of flow presentation (Fig. 3b-c, Supplementary Table 3). Comparisons among groups  
155 within the initial 10s portion of flow showed a significant difference in the distribution of mean  
156 body angles between control and CuSO<sub>4</sub> fish, and between control and neomycin fish (Fig. 3b,  
157 Supplementary Table 3). There was an interaction between treatment and stimulus where the  
158 distribution of mean body angle in CuSO<sub>4</sub>-ablated fish during the initial stimulus bin was different



159 than that of neomycin-ablated fish during the final stimulus bin (Supplementary Table 3),  
160 suggesting that these lesion methods differentially impacted the rheotaxis behavior of fish.

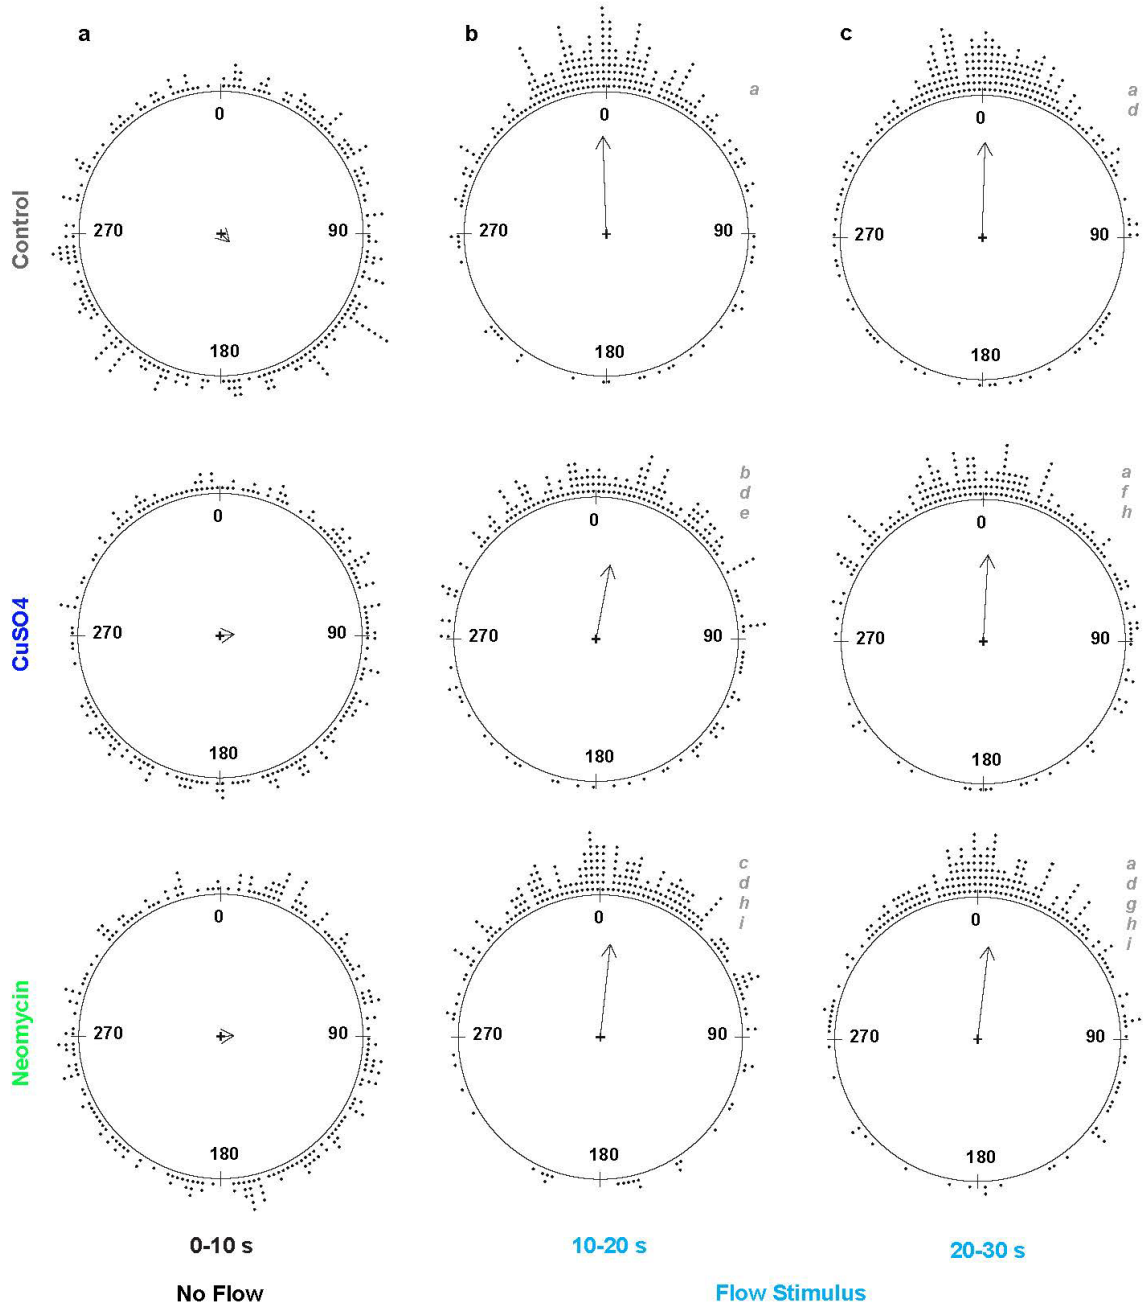

161  
162 **Figure 3. The mean resultant vectors of fish treatment groups before and during water flow stimulus indicates fish with**  
163 **lateral-line organs ablated by CuSO<sub>4</sub>, or neomycin can still perform rheotaxis.** Each dot outside the circles represents the mean  
164 body angle of an individual fish for the 10 s duration of the no flow and flow stimulus conditions. The grand mean vector for each



165 group is represented by a summary vector with an angle, *theta*, and a mean resultant length, *rho*, where the length of the vector  
166 represents the distribution of individual angles around the mean angle of the group. The length of the vector ranges from zero for  
167 uniform distributions, to one for distributions perfectly aligned with the mean angle. Consequently, the angular variance ( $1 - \rho$ ) is  
168 inversely related to vector length. Under no flow ( $t = 0-10$  s), groups of lateral line intact (control,  $n = 248$ ) and lesioned (CuSO<sub>4</sub>,  $n =$   
169 204; neomycin,  $n = 222$ ; 18 experimental sessions) fish have a random distribution of individual mean body angles. Under flow, all  
170 groups show a statistically significant orientation to  $0^\circ \pm 45^\circ$ , but the distributions of the individual mean angles within the groups  
171 differ between the initial ( $t = 10-20$  s) and final ( $t = 20-30$  s) stimulus bins. Distributions with the same lowercase letter indicate  
172 groups that do not differ statistically.

173

#### 174 *Lateral Line-Ablated Fish Performed Rheotaxis for Shorter Durations but Travelled Longer* 175 *Distances*

176 Although an intact lateral line was not required to perform rheotaxis, lesioned fish  
177 behaved differently than non-lesioned fish in flow stimulus, indicating that lack of input from  
178 neuromast hair cells affected rheotaxis behavior. To quantify differences in the gross metrics of  
179 rheotaxis behavior among groups, we used generalized linear mixed models (GLMMs) that  
180 accounted for the random effects of individual variation to compare the mean duration and  
181 mean number of rheotaxis events, total distance traveled, and latency between flow  
182 presentation and behavior onset. We standardized the data by comparing events of rheotaxis to  
183 events when fish were randomly oriented at  $0^\circ \pm 45^\circ$  under no flow. Hereafter both conditions  
184 are referred to as “events”.

185 Without flow, the mean duration of random orientation events did not differ among  
186 treatment groups (Fig. 4a, Supplementary Table 4). With flow, the mean duration of rheotaxis  
187 events increased for each group, and was greatest in the controls, less in neomycin-, and least  
188 in CuSO<sub>4</sub>-treated fish (Fig. 4a, Supplementary Table 4). An interaction between stimulus and  
189 treatment was seen during the initial 10s of flow in the CuSO<sub>4</sub> treatment cohort, but during the  
190 final 10s the differences among all treatments became significant (Supplementary Table 4).  
191 Additionally, there was a significant effect of stimulus and an effect of treatment on the mean

192 number of events where the mean was greatest in neomycin-treated, less in controls, and least  
 193 in CuSO<sub>4</sub>-treated fish under no flow and flow conditions (Fig. 4b, Supplementary Table 5).

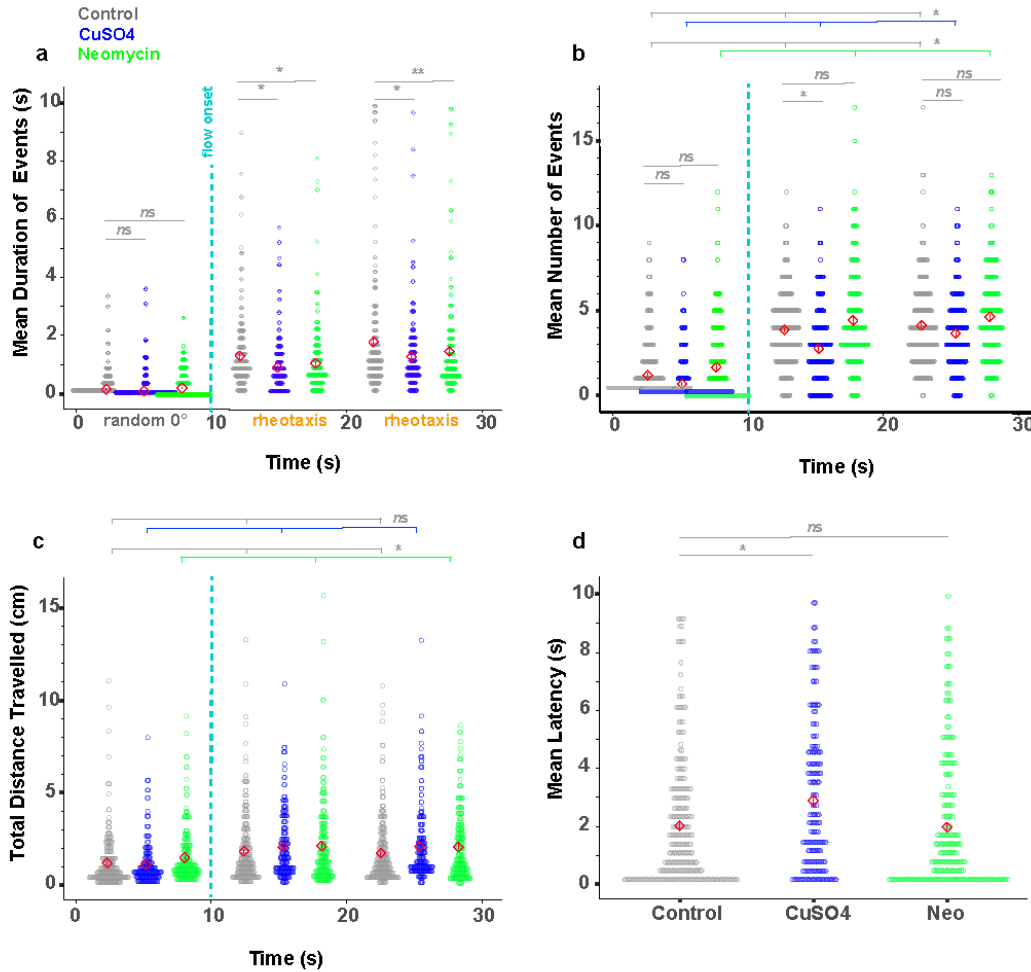

194  
 195 **Figure 4. Lateral line ablated fish performed rheotaxis for shorter mean durations yet travelled greater total distances**  
 196 **compared to controls.** Red diamonds in each plot indicate the mean ± SE values. a) Lateral line intact (gray = control, n=248) fish  
 197 have a longer mean duration of rheotaxis events during flow stimulus than lesioned fish (blue = CuSO<sub>4</sub>, n = 204; green = neomycin,  
 198 n = 222; 18 experimental sessions). b) The mean number of 0° orientation and rheotaxis events was greatest for neomycin fish and  
 199 the least for CuSO<sub>4</sub> fish under no flow and flow conditions, respectively. c) Under no flow, neomycin fish traveled a greater total  
 200 distance than control and CuSO<sub>4</sub> fish; but under flow, neomycin and CuSO<sub>4</sub> fish traveled a greater total distance than control fish. d)  
 201 Compared to control and neomycin fish, CuSO<sub>4</sub> fish had the longest mean latency to the onset of the first rheotaxis event after flow  
 202 stimulus presentation. Lines indicate statistical comparisons between control and treatment groups (see Supplementary Tables 4-7).  
 203 The effects of treatment are indicated by long color-coded bars with branches, whereas interactions are indicated with short bars.  
 204 There was a significant effect of stimulus in a-c (not shown for clarity). Significance values: \* = 0.05, \*\* = 0.01

205

206 The total distance travelled during events was influenced by the flow stimulus and type of lesion,  
207 where neomycin-treated fish travelled further than control and CuSO<sub>4</sub>-treated fish in the  
208 presence and absence of flow (Fig. 4c, Supplementary Table 6). Compared to control and  
209 neomycin fish, CuSO<sub>4</sub>-lesioned fish had a longer latency between flow onset and rheotaxis  
210 initiation (Fig. 4d, Supplementary Table S7). Altogether, our data show that an intact lateral line  
211 allowed fish to sustain rheotaxis into oncoming flow for longer durations yet travel shorter  
212 distances, suggesting that ototoxic compounds reduced the economy of movement of larval  
213 zebrafish in response to flow. These results support the idea that the lateral line allows  
214 epibenthic fish under flow conditions to hold their station with respect to the substrate (<sup>2</sup>, <sup>33</sup>)

215 Interestingly, CuSO<sub>4</sub> and neomycin ablation affected rheotaxis behavior in different  
216 ways. CuSO<sub>4</sub> exposure decreased activity, as evidenced by fewer rheotaxis events with greater  
217 latency between flow delivery and behavior initiation. This contrasts with the neomycin-exposed  
218 fish that exhibited frequent bursts of rheotaxis and travelled longer distances. While zebrafish  
219 larvae have been shown to be relatively resistant to the concentration and exposure time of  
220 CuSO<sub>4</sub> used (<sup>34</sup>), subtle differences in behavior could have been a consequence of nonspecific  
221 neural toxicity. Alternatively, the distinct effects of CuSO<sub>4</sub> and neomycin treatments on the  
222 spatiotemporal nature of rheotaxis might have been due, in part, to their different mechanisms  
223 of neuromast ablation. In CuSO<sub>4</sub>-treated fish, the hair cells were completely ablated, and the  
224 supporting cells and afferent neurons were severely damaged (<sup>17</sup>). However, on occasion a few  
225 hair cells would remain in neomycin-treated fish (Fig. 2c, f). If residual hair cells in the neomycin  
226 group retained some functionality despite severe morphological damage, then it is possible that  
227 their sensitivity might have been amplified through efferent modulation (<sup>35</sup>), or influenced by  
228 intact supporting cells (Fig. 2c, f) and recruited from a “silent” state (e.g.,<sup>36</sup>), to compensate for  
229 reduced sensory input thus resulting in the observed difference in behavior between lesioned  
230 groups.

231

232 *Overall Spatial Use of the Arena During Rheotaxis Differs Among Treatments*

233 During flow, we observed that lateral line-lesioned fish were often pushed against the  
234 back of the testing arena, whereas intact fish were often swimming at the front of the arena near  
235 the flow source. To quantify this observation, density plots of the location of fish in the arena  
236 throughout the duration of the experiment were generated (Fig. 5 (2D); Supplementary Fig. 2  
237 (1D)) then compared among treatments. The total density of fish in 2D space was parsed out  
238 over five regions of interest (ROI, Fig. 5a) that were determined by the size of fish, their  
239 orientation during rheotaxis, and the dimensions of the flow field.

240 Under no flow, fish that were placed into the flume generally avoided the middle as they  
241 explored the boundaries of the arena; however, CuSO<sub>4</sub>-treated fish preferred the middle more  
242 and explored the boundaries less than the control or neomycin-treated fish (Fig. 5a,  
243 Supplementary Fig. 2). Under flow, generalized linear models (Supplementary Table 8) indicate  
244 that the spatial use of fish during rheotaxis differed among all three treatment groups. (Fig. 5d).  
245 Fish from all treatment groups performed rheotaxis with a pronounced preference for the sides  
246 (Fig. 5d) that mimicked the small lateral gradient in the laminar flow field (Supplementary Fig.  
247 3a). The reduced velocity of the laminar flow gradient along the sides was created by a minute  
248 boundary layer of null flow adjacent to the wall that gradually increased (over ~2-5 mm, front to  
249 rear) until it became part of the freestream flow field (i.e., blue arrows in Supplementary Fig. 3).  
250 The gradient provided a refuge (e.g., <sup>37</sup>) where intact and lesioned fish could swim into the flow  
251 with reduced energetic cost (<sup>38</sup>). As our definition of rheotaxis (see methods; Supplementary  
252 Fig. 1d, e) specifies that only fish that moved their tail and had forward body translation into the  
253 flow, fish that were in null water flow (i.e. too close to the wall) were excluded from the rheotaxis  
254 dataset. Furthermore, control fish frequently performed rheotaxis while maintaining position in

255

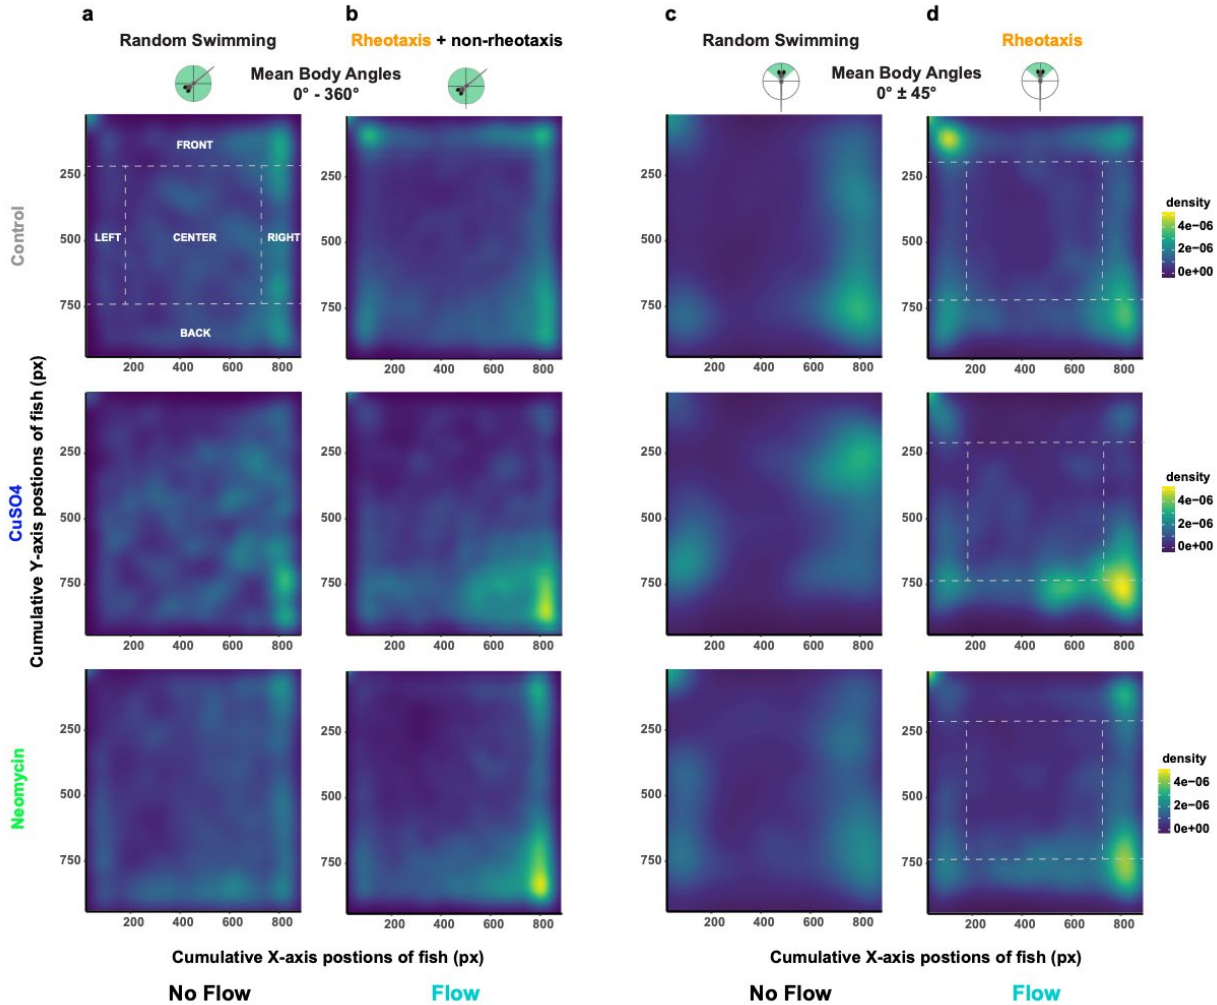

256

257 **Figure 5. Under flow, lateral line intact (control) fish used the front part of the arena near the source of the flow, whereas**  
 258 **lesioned (CuSO<sub>4</sub>, neomycin) fish use the back portion of the arena.** a-b) For all possible mean body angles (0°- 360°): a) all  
 259 treatment groups of fish show similar density, or total spatial use, of the arena under no flow conditions; b) however, the controls  
 260 (control, n = 248) used the front of the arena and the lesioned (CuSO<sub>4</sub>, n = 204; neomycin, n = 222; 18 experimental sessions) fish  
 261 used the back of the arena under flow. c-d) Filtering the data for mean body angles required for rheotaxis (0° ± 45°): c) all groups  
 262 clustered along the left and right sides of the arena under no flow; d) but under flow, the controls used the front-left and the lesioned  
 263 use the back-right portions of the arena. Dotted lines and labels in capital letters indicate spatial regions of interest (ROI). For clarity,  
 264 statistical comparisons among treatment and ROIs were not included in the figure; however, there were significant fixed effects for  
 265 CuSO<sub>4</sub> and neomycin treatments, the back ROI, and interactions between treatment and ROI (Supplementary Table 8).

266

267 the flow near the upper-left corner of the arena whereas lesioned fish primarily occupied the  
 268 back-right corner (Fig. 5d, Supplementary Fig. 3b). These observations indicate that an intact

269 lateral line enabled larval zebrafish to better station hold while occupying the areas of strongest  
270 flow (Supplementary Fig. 3b) and avoid being swept backwards against the rear mesh. The  
271 propensity of lesioned fish to use the rear of the arena while performing rheotaxis in the  
272 absence of visual <sup>(3)</sup> and horizontal vestibular <sup>(31, 32)</sup> cues suggests that these larvae might  
273 have used tactile cues to provide the external frame of reference necessary to orient and swim  
274 against flow <sup>(2, 8, 10)</sup>. Unfortunately, our flume design and camera setup prevented us from  
275 exploring this possibility.

276

### 277 *Lateral Line Ablation Reduces the Proportion of Individual Fish that Perform Rheotaxis*

278 During flow presentation, the control group had the greatest proportion of individual fish  
279 that performed rheotaxis during the experiment (as defined in Supplementary Fig. 1) followed by  
280 neomycin-treated then CuSO<sub>4</sub>-treated groups (Fig. 6). Intact fish plateaued relatively quickly  
281 compared to lesioned fish, but the values for all three groups converged during the final few  
282 seconds of flow presentation.

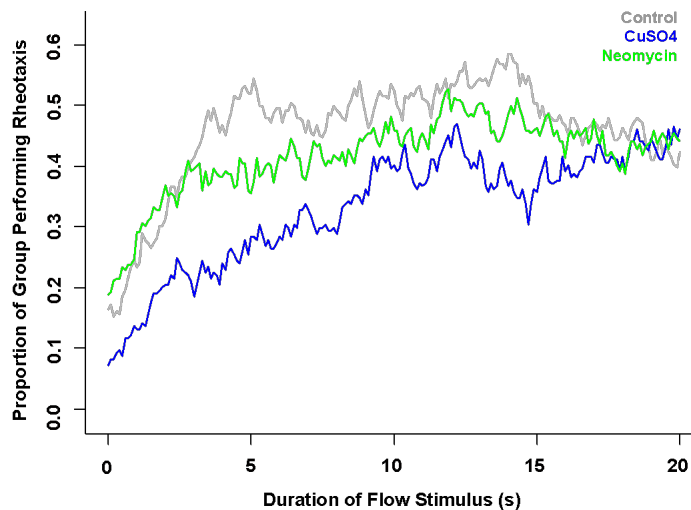

283

284 **Figure 6. Intact lateral line enabled a greater proportion of fish to perform rheotaxis within the first 15 seconds of stimulus**  
285 **onset.** Time series of the proportion of individual fish within each group that performed rheotaxis during flow presentation. A greater

286 proportion of lateral line intact (gray = control, n = 248) fish performed rheotaxis than lesioned (blue = CuSO<sub>4</sub>, n = 204; green =  
287 neomycin, n = 222; 18 experimental sessions) fish. The data for all treatments converges after 17 s of flow presentation.

288

289 *Spectral Decomposition Shows that Lateral Line Ablation Impacts the Overall Trend and*

290 *Periodic Fluctuation in Linear and Angular Movement*

291 To uncover the impact that lateral line ablation had on the swimming kinematics of fish,  
292 we analyzed how the magnitude of the linear (relative distance moved, relative velocity,  
293 relative acceleration) and angular (mean body angle, mean length of the resultant vector)  
294 components of movement changed over time. We observed that all treatment groups swam in  
295 the burst-and-glide style that is characteristic of larval zebrafish with intact lateral lines, but with  
296 noticeable differences in the quality of their movement. Because the lateral line mediates station  
297 holding behavior (<sup>2</sup>, <sup>33</sup>, <sup>38</sup>), we postulated that, under flow, the oscillations in relative linear and  
298 angular movements for lateral line-intact fish would be smaller in magnitude than those of  
299 lesioned fish. The observed time series data (Fig. 7a, d, g; Supplementary Fig. 4a, d) had a  
300 “seismic” appearance where noise masked the underlying signal. Therefore, we removed the  
301 random noise (Supplementary Fig. 4g-k) and decomposed the observed datasets into their  
302 fundamental large- and small-scale components: the overall trend in movement magnitude  
303 during the entire experiment (Fig. 7b, e, h; Supplementary Fig. 4b, e) and the periodicity, or  
304 recurring fluctuations in movement magnitude, that occurred during any given second of the  
305 experiment (Fig. 7c, f, i). Because the relative movement (Fig. 7), velocity and acceleration  
306 (Supplementary Fig. 4c, f) data showed similar periodic fluctuations, only relative movement is  
307 shown in Fig. 7 for visual clarity.

308 During rheotaxis, the trend among groups was that CuSO<sub>4</sub> ablation reduced the  
309 magnitude of relative movement (Fig. 7b) but not the relative velocity or acceleration of fish  
310 (Supplementary Fig. 4c, f) compared to control and neomycin groups. CuSO<sub>4</sub>- and neomycin-  
311 treated fish had a trend of reduced ability to achieve and maintain orientation within flow relative



312 to controls (Fig. 7e). Lesioned fish had mean resultant vectors ( $\rho$ ) of longer length meaning  
313 that they had less variance ( $1 - \rho$ ) in their mean body angle compared to controls (Fig. 7h).  
314 These data suggest that an intact lateral line allowed control fish to better detect changes in  
315 water flow, regularly make small magnitude course corrections to their body angle (Fig. 7h),  
316 rapidly orient into flow with greater accuracy (Fig. 7e), which resulted in a greater proportion of  
317 non-lesioned fish performing rheotaxis compared to lesioned fish (Fig. 6).

318

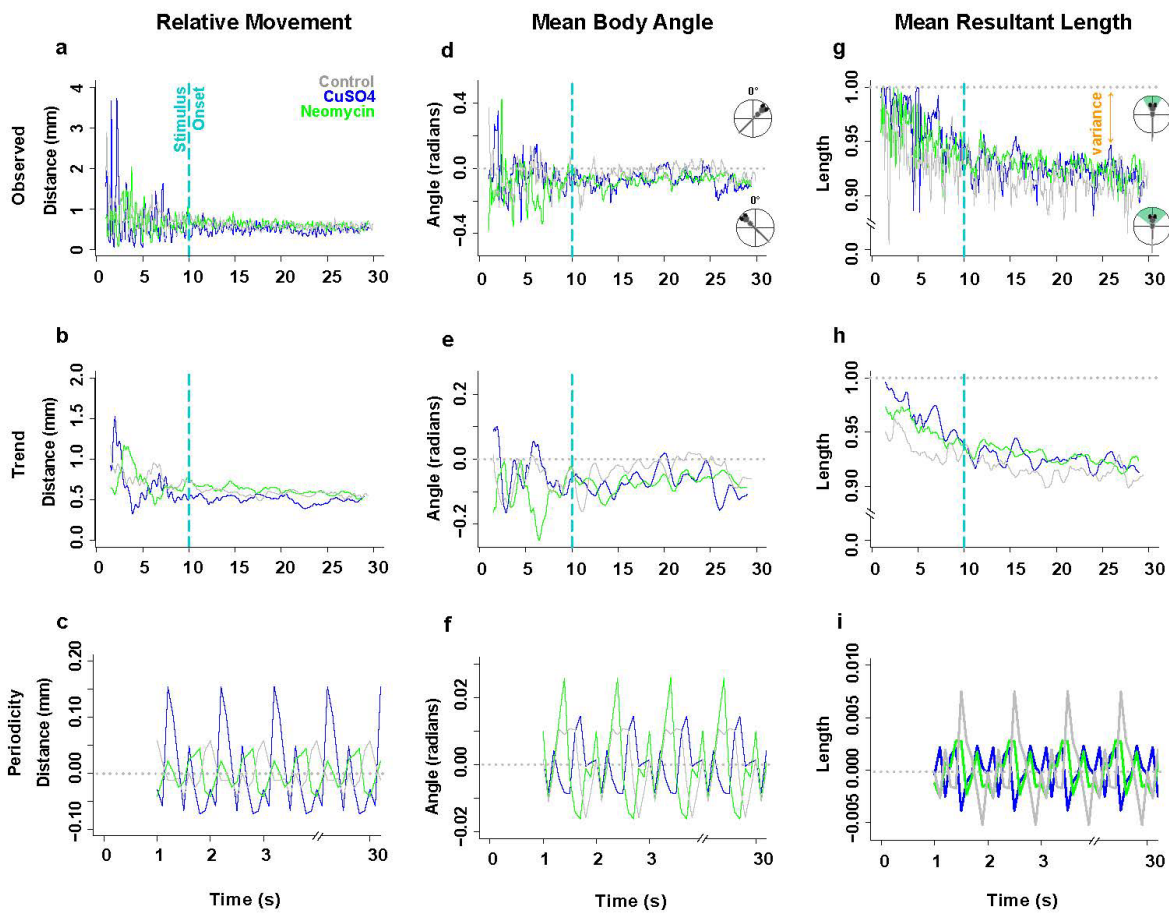

319

320 **Figure 7. The overall trends and periodic fluctuations in the linear (relative distance moved) and angular (mean body angle,**  
321 **mean length of the resultant vector) motion parameters of rheotaxis behavior differ among treatment groups.** (Note: the  
322 relative velocity and acceleration periodicity data mimicked the patterns observed in relative movement; see Supplementary Fig. 3).  
323 Gray = control (n = 248), blue = CuSO<sub>4</sub> (n = 204), green = neomycin (n = 222). Spectral decomposition of the observed data (a, d, g)  
324 removed the noise (Supplementary Fig. 3g, h, i) to reveal the overall underlying trends (b, e, h) and the periodicity, or recurring

325 fluctuations (c, f, i) that occurred during any given 1 s of the experiment. The periodicity waveform peaks (c, f, i) indicate the average  
326 amount (amplitude), number, direction (positive = increasing; negative = decreasing), and order of occurrence for these cyclic  
327 fluctuations as a function of unit time (1 s). The overall trends were that CuSO<sub>4</sub> treated fish had the least relative movement (b),  
328 while the control fish more rapidly oriented to 0° (e) and swam with more angular variance (h; 1 – mean length of the resultant  
329 vector) compared to lesioned fish. The periodic fluctuation in relative distance moved (c) was greatest in CuSO<sub>4</sub> treated fish  
330 compared to control or neomycin treated fish. However, the fluctuation in mean body angle (f) was greatest in neomycin treated fish  
331 compared to control and CuSO<sub>4</sub> fish, while the fluctuation in mean length of the resultant vector (i.e the angular variance; i) was  
332 greatest in control fish compared to lesioned fish.

333

334         Among treatment groups, there were clear differences in the magnitude of changes in  
335 the periodic cycles of linear (Fig. 7c; Supplementary Fig. 4c, f) and angular (Fig. 7f, i)  
336 movements during rheotaxis. The linear data show that CuSO<sub>4</sub>-treated fish had fluctuations of  
337 the greatest magnitude in relative distance moved, velocity, and acceleration compared to those  
338 of control and neomycin-treated fish (Fig. 7c; Supplementary Fig. 4c, f; Supplementary Table 9).  
339 In CuSO<sub>4</sub>-treated fish, the amplitude of the waveform peaks during the sampling period was  
340 large and decreased rapidly, but in control and neomycin-treated fish the peaks were small and  
341 increased gradually (Fig. 7c; Supplementary Fig. 4c, f). The large fluctuations of CuSO<sub>4</sub>-treated  
342 fish could serve to compensate for their delayed response to flow (Fig. 4d), but when their trend  
343 of lesser relative movement (Fig. 7b) is considered, it results in the greatest relative increase in  
344 distance traveled among groups (Fig. 4c). These empirical data support the qualitative  
345 observations that CuSO<sub>4</sub>-treated fish performed rheotaxis with delayed responses and erratic  
346 linear movements, whereas control and neomycin-ablated fish performed rheotaxis with low  
347 latency responses and graded linear movements.

348         The periodic fluctuation in mean body angle among treatment groups showed an initial  
349 small turn to the left (negative values) followed by a series of right (positive values) and left  
350 turns that were of relatively small magnitude in controls and CuSO<sub>4</sub>-treated fish, and relatively  
351 large magnitude in neomycin-treated fish (Fig. 7f; Supplementary Table 9). The amplitude of the  
352 waveform peaks in control and CuSO<sub>4</sub>-treated fish were relatively small and gradually increased

353 during the sampling period, but those of neomycin-treated fish were relatively large throughout.  
354 Therefore, control and CuSO<sub>4</sub>-treated fish performed rheotaxis with a graded response in mean  
355 body angle, but neomycin-treated fish performed rheotaxis with large erratic changes in mean  
356 body angle. We also examined the periodicity in mean resultant length, which reflects the  
357 fluctuation in angular variance as fish performed rheotaxis. In control fish, the waveform had  
358 peaks of small amplitude that rapidly increased during the sampling period, but in lesioned fish  
359 the waveform was comprised of small peaks of consistent amplitude (Fig. 7i). Intact fish showed  
360 a graded response where small initial changes in angular variance preceded much larger  
361 subsequent changes that coincided with the flat portion of the peaks in mean body angle (Fig.  
362 7f), which indicates that control fish regularly made small changes in their body angle and  
363 maintained this new heading before making another angular adjustment. Conversely, lesioned  
364 fish had very little fluctuation in angular variance (Fig. 7i) once a mean body angle was chosen,  
365 regardless of whether the change in mean body angle was relatively small (e.g., CuSO<sub>4</sub>) or  
366 large (e.g., neomycin; Fig. 7f).

367         These data support that, during rheotaxis, fish with an intact lateral line organ made  
368 small adjustments to their linear movement, velocity, acceleration, and mean body angle with a  
369 high degree of variability. This graded, flexible, and finely tuned behavioral response to flow  
370 resulted in a greater ability of control fish to rapidly attune and maintain fidelity to the oncoming  
371 flow vector (Fig. 7e). Conversely, CuSO<sub>4</sub>- and neomycin-ablation caused fish to swim into flow  
372 with erratic linear and angular movements, respectively, which ultimately undermined their  
373 ability to maintain a 0° heading into the flow (Fig. 7e).

374

### 375 *Spectral Analysis Reveals that Lateral Line Ablation Impacts the Temporal Fluctuation of Linear* 376 *and Angular Movement*

377         To determine the impact that lateral line ablation had on the frequency of the fluctuations  
378 in linear and angular movement, we decomposed each periodicity dataset (Fig. 7c, f, i;

379 Supplementary Fig. 4c, f) into a power spectrum that depicted the spectral density (i.e., number  
380 of changes in movement per frequency) over a continuous range of frequencies (Fig. 8a-e). For  
381 each parameter, the frequency and amplitude of three most dominant peaks were summed to  
382 calculate the net shifts in frequency and spectral density among treatment groups  
383 (Supplementary Table 10). Relative to controls, the power spectra of CuSO<sub>4</sub>- and neomycin-  
384 treated fish showed a net shift to lower dominant frequencies (downshift) and a net increase in  
385 the density of the dominant peaks for relative movement, velocity, and acceleration (Fig. 8a-c,  
386 Supplementary Table 10), which indicates that lateral line-ablated fish performed rheotaxis with  
387 greater numbers of linear movements to compensate for their overall reduction in fluctuation  
388 frequency. The rheotaxis behavior of CuSO<sub>4</sub>-treated fish showed less frequent fluctuations in  
389 relative movement compared to controls and neomycin-treated fish (Fig 8a), but the fluctuations  
390 in relative velocity and acceleration for CuSO<sub>4</sub>-treated fish and controls occurred over a wider  
391 range of frequencies than those of neomycin-treated fish (Fig 8b-c). Specifically, the relative  
392 movement spectra of the control and CuSO<sub>4</sub>-treated fish had broad clusters of dominant peaks  
393 that gradually shifted to higher frequencies (upshifted) for relative velocity and acceleration.  
394 However, the spectra of neomycin-treated fish were dominated by a single high-density peak  
395 that consistently occurred at 0.21 Hz for relative movement, velocity, and acceleration (Fig. 8a-  
396 c). These data reveal that lateral line ablation results in rheotaxis behavior characterized by  
397 fluctuations in relative movement, velocity and acceleration that occur less frequently, but that  
398 neomycin ablation has the additional effect of “temporally restricting” the frequency of  
399 fluctuations in linear movement to occur around a consistent dominant frequency.

400 Power spectra density curves indicated that intact fish performed rheotaxis with fewer  
401 numbers of fluctuations in mean body angle that occurred less frequently, whereas lesioned fish  
402 performed rheotaxis with a greater numbers of high frequency fluctuations in mean body angle.  
403 The spectrum of controls shows five broadly spaced peaks, but those of the lesioned fish have  
404 fewer peaks that are clustered around the dominant frequencies (Fig. 8e) indicating that intact

405 fish performed rheotaxis with greater variety in the frequency of fluctuations in their angular  
406 variance compared to lesioned fish (Fig. 8e). We observed the mean body angle of CuSO<sub>4</sub>- and  
407 neomycin-treated fish showed a net upshift in the dominant frequencies, a net increase in  
408 dominant peak density, and temporal restriction, or greater clustering of power spectra into  
409 distinct peaks, relative to that of controls (Fig. 8d, Supplementary Table 10). By contrast, the  
410 spectrum of control fish was relatively flat with low density peaks that lacked distinct clustering  
411 into dominant frequencies (Fig. 8d) Additionally, there were two divergent patterns seen in the  
412 power spectra for mean resultant vector length in lesioned fish: CuSO<sub>4</sub>-treated fish had a net  
413 downshift in dominant frequencies and a net increase in peak density, whereas neomycin-  
414 treated fish had a net upshift in frequency and a net decrease in peak density relative to those  
415 of controls (Fig. 8e, Supplementary Table 10). Thus, CuSO<sub>4</sub>-lesioned fish performed rheotaxis  
416 with greater number of fluctuations in angular variance that occurred less frequently, but  
417 neomycin-lesioned fish performed rheotaxis with fewer numbers of fluctuations in angular  
418 variance that occurred more frequently compared to intact fish. These results show that lateral  
419 line ablation in larval zebrafish resulted in rheotaxis behavior with greater numbers of  
420 fluctuations in mean body angle, fewer numbers of fluctuations in angular variance, and a  
421 greater clustering of angular movements into fewer peaks.

422

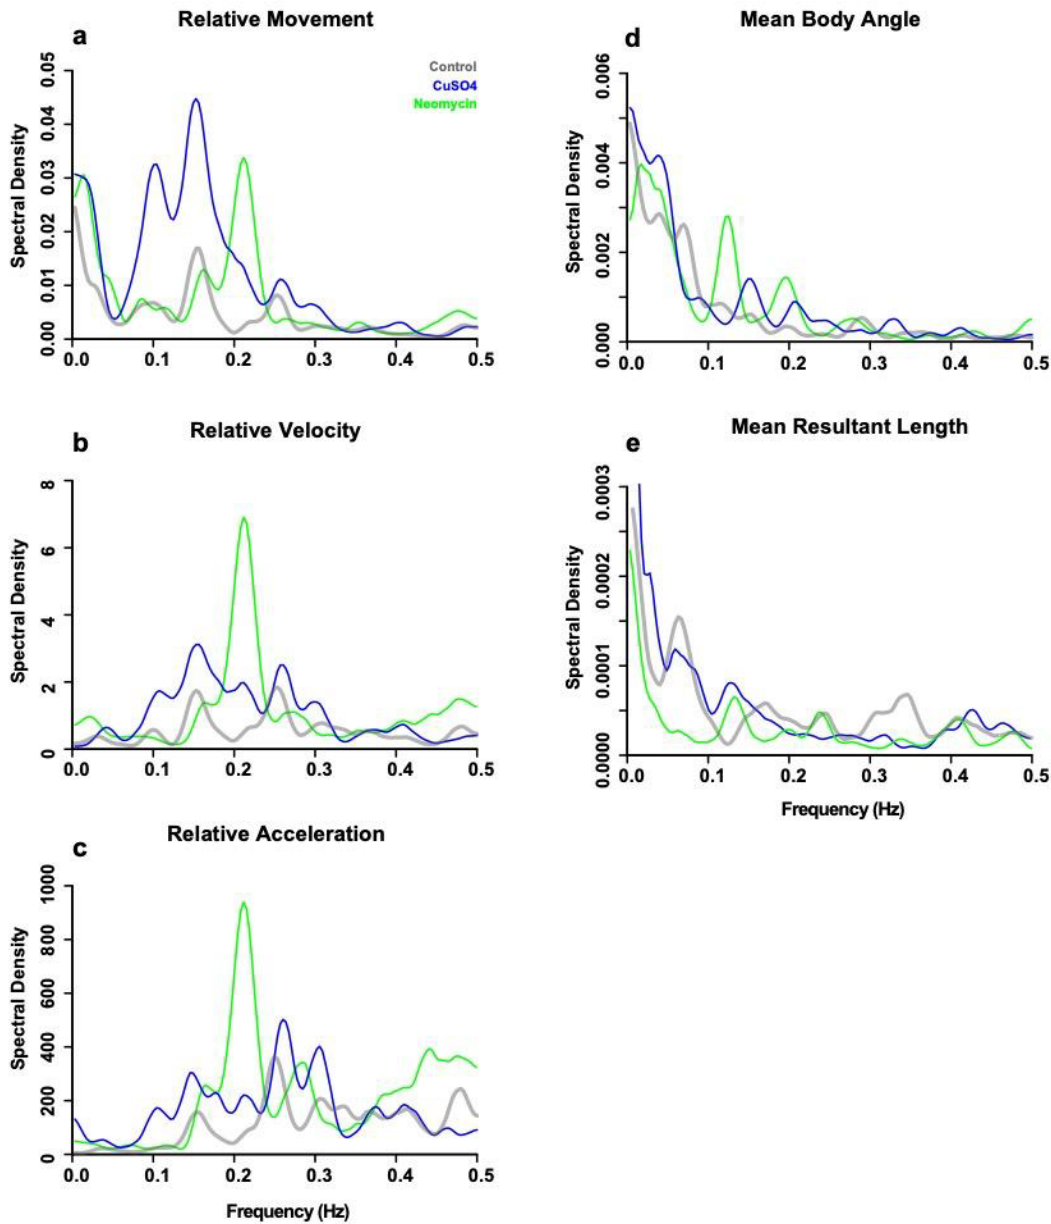

423

424 **Figure 8. Power spectra density curves show that an intact lateral line allowed fish to make fewer yet more temporally**  
425 **variable changes in relative linear and angular movement.** Because frequency and period are inversely related, the low  
426 frequency peaks to left of the periodograms indicate cycles with longer periods, and vice versa The amplitude of the peaks indicates  
427 the spectral density, or the number of movement events at a given frequency that occurred during the experiment. The peaks with  
428 the greatest amplitude indicate the fundamental or dominant frequencies of fluctuation in the periodicity data. The frequency and  
429 amplitude of three most dominant peaks were summed to calculate the net shifts in frequency and power. Relative to controls (gray,  
430  $n=248$ ), lesioned (blue =  $\text{CuSO}_4$ ,  $n=204$ ; green = neomycin,  $n=222$ ) fish had a net downshift in the three dominant frequencies of  
431 (a) relative movement, (b) velocity, and (c) acceleration and a net upshift in (d) mean body angle of larval zebrafish during rheotaxis.

432 For the dominant frequencies of (e) mean resultant length, there was a net downshift and upshift for CuSO<sub>4</sub>- and neomycin-treated  
433 fish, respectively. Furthermore, relative to lateral line intact fish, the peaks of lesioned fish are clustered into fewer peaks of greater  
434 amplitude over a relatively narrow range, which indicates that lateral line ablation increased the number yet reduced the temporal  
435 variation of changes in movement.

436

437 We interpret the relatively flat and low-density power spectra observed in control fish  
438 (Fig. 8a-d) to indicate that an intact lateral line allowed fish to respond to flow with fewer overall  
439 fluctuations in linear and angular movement over a broader range of fluctuation frequencies  
440 compared to lesioned fish. It is sensible that the mechanosensory input from lateral line hair  
441 cells gave intact fish a greater ability to respond to flow with greater efficiency, efficacy, and  
442 economy of movement. Conversely, fewer peaks of greater density observed in lateral line  
443 lesioned fish indicates that losing the ability to detect water flow led to more changes in linear or  
444 angular movement that occurred over a restricted range of frequencies thus reducing the  
445 effectiveness of their movements in response to flow.

446

#### 447 *Cross Correlation Between Linear and Angular Movements Shows Distinct Rheotaxis Profiles* 448 *Among Groups*

449 In the absence of visual cues, intact larval zebrafish detected the presence of flow  
450 through a change in linear or angular displacement (<sup>22</sup>) and responded by either turning right,  
451 left, or moving forward into the flow. Because these movements relied on input from the lateral  
452 line, we investigated the effect of ototoxic compounds on the cross correlation between linear  
453 and angular movements. The correlograms depict the degree, direction, and relative timing  
454 between an above average increase in relative movement (Fig. 9a-b), velocity (Fig. 9c-d), or  
455 acceleration (Fig. 9e-f) and an above average change in mean body angle (Fig. 9a, c, e) or  
456 mean resultant length (Fig. 9b, d, f). By focusing on the strongest cross-correlations, treatment-  
457 specific patterns emerged in the direction and relative timing between large changes in linear  
458 and angular movements during rheotaxis.



459           The rheotaxis movements of control fish in response to flow were smoother, less erratic,  
460 and more effective at station holding within the flow field compared to those of lesioned fish. The  
461 rheotaxis profile of control fish was such that the relative timing and direction of changes in  
462 mean body angle depended upon the time derivative of the linear movement, but changes  
463 angular variance were consistent across all linear movements. For example, intact fish tended  
464 to change their mean body angle to the *left* of flow *before* a large change in relative movement  
465 (Fig. 9a), to the *right* of flow *simultaneous* with changes in velocity (Fig. 9c), and to the *left* of  
466 flow *after* changes in acceleration (Fig. 9e). However, the strongest correlation between a  
467 *reduction* in angular variance always occurred *prior* to large changes in relative movement (Fig.  
468 9a), velocity (Fig. 9c), and acceleration (Fig. 9e). In lesioned fish, the timing and direction of the  
469 strongest cross-correlations shifted the rheotaxis profile of these fish away from that of controls  
470 in a predictable, consistent, and treatment-specific manner. CuSO<sub>4</sub>-treated fish tended to  
471 change their mean body angle to the *right* of the oncoming flow vector *after* large changes in  
472 movement (Fig. 9a), velocity (Fig. 9c), and acceleration (Fig. 9e). However, neomycin-treated  
473 fish tended to change their body angle to the *left* of the flow *after* changes in movement (Fig.  
474 9a), velocity (Fig. 9c), and acceleration (Fig. 9e). As in controls, lesioned fish always had a  
475 *reduced* angular variance correlated with changes in their linear movements, but the relative  
476 timing of the cross correlation shifted according to the ototoxic compound used and the time  
477 derivative of the linear movement. In CuSO<sub>4</sub>-treated fish, the strongest correlation between a  
478 *reduction* in angular variance tended to occur *prior* to changes in movement (Fig. 9b), and *after*  
479 changes in velocity (Fig. 9d) or acceleration (Fig. 9f). Conversely, in neomycin-treated fish,  
480 *reductions* in angular variance occurred *after* changes in movement (Fig. 9b), and *before*  
481 changes in velocity (Fig. 9d) or acceleration (Fig. 9). These data revealed that control fish with  
482 an intact lateral line detected oncoming flow and adjusted their mean body angle *prior* to  
483

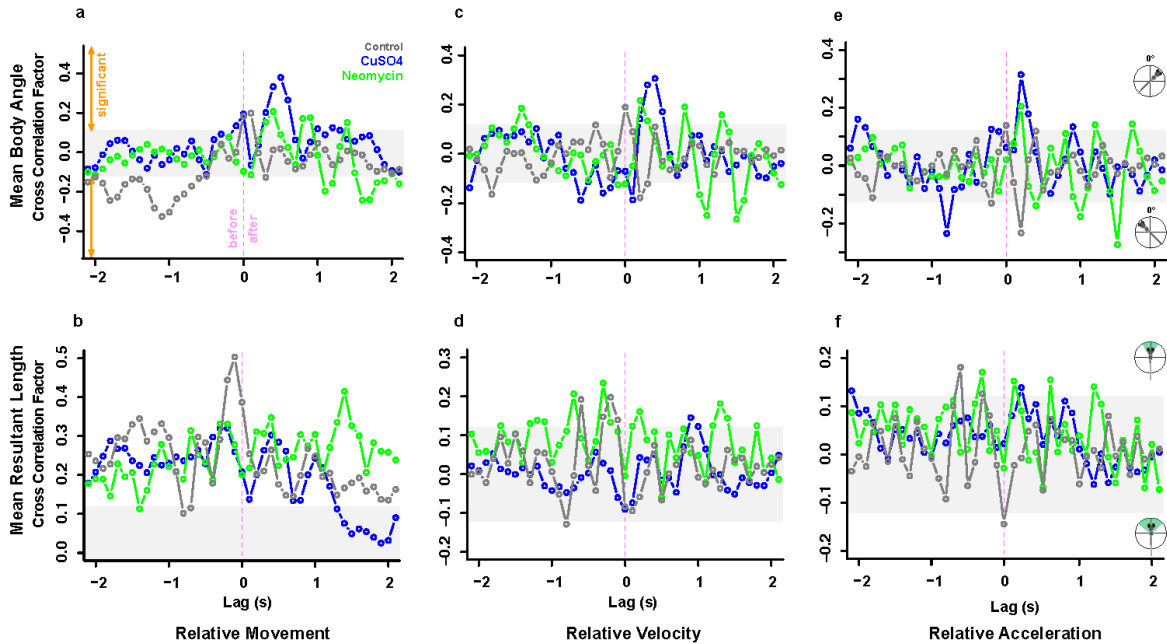

484

485 **Figure 9. Cross correlations between linear and angular movement data indicate ototoxic compound-specific changes to**

486 **the rheotaxis behavioral profile of fish.** The correlograms depict how an above average increase in relative movement (a, b),

487 relative velocity (c, d), or relative acceleration (e, f) were significantly cross correlated with above average increases or decreases in

488 the mean body angle (a, c, e) or mean resultant length (b, d, f). In the figures for mean body angle (a,c,e), the positive and negative

489 peaks indicate that fish were oriented to the right or left of the oncoming flow vector, respectively. In the figures for mean resultant

490 length (b, d, f), the positive and negative peaks indicate fish that had a lesser or greater variance of the mean body angle,

491 respectively. The X-axis indicates the relative timing, or lag, of the cross correlation between the angular parameter with respect to

492 an above average increase in the linear parameter (zero = simultaneous occurrence; negative = angular change occurs *before*

493 linear change; and positive = angular change occurs *after* linear change). *For example, interpret panel 10a as:* In control (gray, n =

494 248) fish, above average increases in relative movement are significantly correlated with changes in mean body angle to the left of

495 the flow vector that previously occurred. In CuSO<sub>4</sub>-treated (blue, n =204) fish, above average increases in relative movement are

496 significantly correlated with above average changes in mean body angle that subsequently occurred. In neomycin-treated (green, n =

497 222) fish, above average increases in relative movement are significantly correlated with below average changes in mean body

498 angle that subsequently occurred.

499

500 making a change in their relative movement, while lateral line lesioned fish changed their mean

501 body angle *after* a change in their relative linear movement. Our results support the reported

502 mechanism of water flow detection in larval zebrafish where they use their lateral line hair cells

503 to sense the vorticity, or curl, created by gradients in the flow field the determine flow direction  
504 by measuring the temporal change in vorticity as they experience flow <sup>(22)</sup>.

505 It appears that an intact lateral line allowed fish to rapidly detect flow and adjust their  
506 heading prior to swimming into the flow. However, in the absence of lateral line and visual cues,  
507 and the inability of 6-7dpf zebrafish larvae to detect horizontal angular cues (yaw) by the  
508 vestibular system <sup>(31, 32)</sup>, it is possible that lesioned fish might have relied on tactile cues, such  
509 as physical displacement along the substrate, to gain an external frame of reference necessary  
510 to orient and swim into flow. Intact fish also tended to change their body angle to the left of the  
511 flow vector, which may reflect lateral line handedness where larval zebrafish prefer to use the  
512 left side of their lateral line to detect flow stimuli in a manner like that of blind cavefish <sup>(39)</sup>.  
513 Lateral line ablation shifted the relative timing of the cross correlations between angular and  
514 linear movement and might have impaired any potential lateral line handedness, which may  
515 have further contributed to the erratic rheotaxis behavior observed in lesioned fish.

516 In summary, lateral line ablation of larval zebrafish resulted in distinct, treatment-specific  
517 rheotaxis profiles that differed from that of intact fish in the following ways: 1) delayed relative  
518 timing between changes in mean body angle and all linear movements, 2) changed mean body  
519 angle in response to flow, and 3) shifted timing between reductions in angular variance and  
520 changes in linear movement.

521

## 522 **CONCLUSIONS**

523 In this study, ablating the lateral line of larval zebrafish with two commonly used ototoxic  
524 compounds impacted their ability to produce the fine adjustments required to station hold in  
525 response to water flow. Lateral line ablation inhibited the ability of fish to discriminate subtle  
526 distinctions in flow, resulting in more intense overcorrections and decreased economy of motion.  
527 Our data support the hypotheses that the lateral line mediates station holding behavior <sup>(2, 33, 38)</sup>,  
528 but is not required for rheotaxis behavior <sup>(2, 11, 12, 29, 30)</sup> in larval zebrafish in non-uniform laminar

529 flow. We posit that the physical displacement of lesioned fish along the substrate may have  
530 provided sufficient tactile cues (<sup>8</sup>, <sup>10</sup>) necessary for lateral line ablated fish to perform rheotaxis.

531 We propose that the greater angular variance observed in intact fish might indicate that  
532 these fish were regularly sampling the velocity gradients of the flow stimuli (<sup>22</sup>) from a variety of  
533 body angles so that they could reduce their response latency, quickly orient with respect to  
534 fluctuating flow stimuli, and maintain their overall mean body angle with greater fidelity to the  
535 flow vector than lesioned fish. During flow, intact fish had recurring fluctuations in relative  
536 movement, velocity, and mean body of lower magnitude, and fluctuations in relative movement,  
537 velocity, acceleration, and mean body angle of controls that were fewer in number yet occurred  
538 over a wider range of temporal frequencies compared to lesioned fish. Thus, the sensory cues  
539 detected by the lateral line allowed control fish to respond to water flow with less intensity and  
540 greater temporal variation in their movements, resulting in greater economy of movement.

541 This is the first study to demonstrate that two ototoxic compounds commonly used to  
542 ablate the lateral line impacts the behavioral profiles and mechanism of rheotaxis in zebrafish.  
543 We propose a novel functional assay for understanding the behavioral impacts of sensory hair  
544 cell ototoxicity, which may be used to supplement future studies exploring lateral line injury,  
545 protection, and recovery. Furthermore, the simplicity of the equipment and precision of the  
546 machine learning analyses used in this assay make it amenable to adaptation for detecting  
547 subtle behavioral changes in a wide variety of animal models.

548

## 549 **METHODS**

### 550 *Ethics Statement*

551 This study was performed with the approval of the Institutional Animal Care and Use  
552 Committee of Washington University School of Medicine in St. Louis and in accordance with  
553 NIH guidelines for use of zebrafish.

554

555 *Zebrafish*

556 Adult zebrafish were raised under standard conditions at 27-29°C in the Washington  
557 University Zebrafish Facility. The wild type line AB\* was used for all experiments unless  
558 otherwise stated. Embryos were raised in incubators at 28°C in E3 media (5 mM NaCl, 0.17 mM  
559 KCl, 0.33 mM CaCl<sub>2</sub>, 0.33 mM MgCl<sub>2</sub>; <sup>(40)</sup>) with a 14:10 hr light:dark cycle. After 4 days post  
560 fertilization (dpf), larvae were raised in 100-200 mL E3 media in 250-mL plastic beakers and fed  
561 rotifers daily. Sex was not considered because it cannot be determined in zebrafish larvae at the  
562 developmental stage used in this study.

563

564 *Lateral Line Ablation*

565 At 6 or 7dpf, ~15 larval zebrafish were placed into each well of a flat bottom 6-well  
566 polystyrene plate (#351146, Falcon) in 8 mL of E3 media. Treatment animals were placed into  
567 50 µM neomycin trisulfate salt hydrate (N1876-25G, Sigma Aldrich) or 10 µM CuSO<sub>4</sub> (451657-  
568 10G, Sigma Aldrich) solutions made in 8 mL of E3 media. The concentration of neomycin used  
569 (50 µM) was chosen to introduce the maximum amount of lateral line hair cell loss with minimal  
570 damage to muscle fibers <sup>(41)</sup>. The plate was placed into an incubator at 29°C and exposed to  
571 the treatment for 30 min (neomycin) or 60 min (CuSO<sub>4</sub>). After exposure, the fish were removed  
572 from treatment, rinsed 3X in media, placed into 8 mL of clean media and allowed to recover in  
573 the incubator for 120 min (CuSO<sub>4</sub>) or 150 min (neomycin) to standardize the total experimental  
574 time to 180 min. Control fish received no chemical treatments yet underwent the same  
575 procedures as the CuSO<sub>4</sub> and neomycin fish. At the end of treatment, the larvae were removed  
576 from the incubator and immediately began rheotaxis behavior trials.

577

578 *Immunohistochemistry*

579 Lateral line ablation was confirmed via immunohistochemistry on a subset of control and  
580 lesioned fish used in the behavior experiments. Larvae were sedated on ice (5 min, 0°C) then  
581 fixed overnight at 4°C in PO<sub>4</sub> buffer with 4% paraformaldehyde, 4% sucrose, and 0.2 mM CaCl<sub>2</sub>.  
582 Larvae were rinsed 3X with PBS and blocked for 2 hr at room temperature in PBS buffer with  
583 5% horse serum, 1% Triton-X, and 1% DMSO. Primary antibodies for Otoferlin (HCS-1, mouse  
584 IgG2a, 1:500, Developmental Studies Hybridoma Bank,) and Calbindin (mouse IgG1, 1:1000,  
585 Cat#:214011, Synaptic Systems) were diluted in 1x PBS buffer with 2% horse serum and 0.1%  
586 Triton-X, then incubated with the larvae overnight at 4°C with rotation. Larvae were rinsed 5X  
587 with PBS solution, then placed in secondary antibody (goat anti-mouse IgG2a, Alexa 488,  
588 1:1000, ThermoFisher; goat anti-mouse IgG1, Alexa 647, 1:1000, ThermoFisher) diluted in PBS  
589 with 2% horse serum and incubated for 2 hr at 22°C with rotation. Fish were rinsed 3X with PBS  
590 then incubated with DAPI (1:2000, Invitrogen) in PBS for 20 min at 22°C to label cell nuclei.  
591 Larvae were rinsed 2X with PBS then mounted onto glass slides with elvanol (13% w/v polyvinyl  
592 alcohol, 33% w/v glycerol, 1% w/v DABCO (1,4 diazobicyclo[2,2,2] octane) in 0.2 M Tris, pH 8.5)  
593 and #1.5 cover slips.

594

### 595 *Confocal Imaging and Hair Cell Quantification*

596 Immunolabeled z-stack images were acquired via an ORCA-Flash 4.0 V3 camera  
597 (Hamamatsu) using a Leica DM6 Fixed Stage microscope with an X-Light V2TP spinning disc  
598 confocal (60 µm pinholes) controlled by Metamorph software. The region of interest tool in  
599 Metamorph was used to select specific neuromasts (~700 x 700 px) from the surrounding area.  
600 Z-stack images of 100 ms exposure were acquired through a 63X/1.4 N.A. oil immersion lens,  
601 0.5 µm z-step size. Excitation for DAPI (405 nm) Alexa 488, and Alexa 647 was provided by  
602 89 North LDI-7 Laser Diode Illuminator on the lowest power setting (20%) that could acquire  
603 images and minimize photobleaching. Confocal images were processed in FIJI (ImageJ, NIH)

604 software to create maximal intensity z-stack projections with minor exposure and contrast  
605 adjustments. Hair cells were quantified by scrolling through z-stacks and counting only cells that  
606 had both DAPI and HCS-1 labels present. Any hair cells that had pyknotic nuclei (indicated by  
607 condensed DAPI labeling) were not included in the counts. For each fish, the mean number of  
608 hair cells per neuromast for the midline was calculated among multiple locations (L3-5), and for  
609 the supra orbital (SO1, SO2) neuromasts the mean was calculated between the left and right  
610 locations to account for interindividual variation. Hair cell count distributions were tested for  
611 normality; statistical significance was determined using the Kruskal-Wallis test with Dunn's  
612 multiple comparisons post hoc tests using GraphPad Prism 9.2.0.

613

#### 614 *Experimental Apparatus for Rheotaxis Behavior*

615 A microflume (220 x 100 x 40 mm; Fig. 1a) was constructed in two pieces of translucent  
616 clear resin (RS-F2-GPCL-04, Formlabs) using a high-resolution 3D printer (Form 2, Formlabs)  
617 and joined with two-stage epoxy. Flow collimators (~40mm long) made of ~3mm diameter  
618 plastic straws were placed immediately upstream of the working section in a portion of the flume  
619 bounded on either side by plastic mesh (25  $\mu$ m) that was cemented to the wall with epoxy (Fig.  
620 1a). Silicone sealant was used to cement a 1 mm-thick layer of plastic on top of flume to prevent  
621 water spillage from the high-pressure side of the flume by covering the pump outflow, first bend,  
622 and flow collimators up to the working section. The low-pressure portion of the flume  
623 downstream from the working section was open at the top to facilitate the addition and removal  
624 of larval zebrafish and water when necessary. Larvae were isolated within the upper 10 mm of  
625 the flume working section to enable reliable video recording by a square (30 x 30 x 10 mm)  
626 arena that was 3D printed from clear resin. Plastic mesh (25  $\mu$ m) was cemented with epoxy to  
627 the upstream and downstream sides of the removable arena which allowed water to flow  
628 through the working section after the arena was friction seated into the channel at the top of the  
629 flume and immediately adjacent to the flow collimators. An Arduino (UNO R3, Osepp) with a



630 digital display used custom scripts to control the onset and offset of the pump and camera to  
631 ensure the consistent duration of water flow and video recordings. Flow of constant velocity was  
632 provided by a 6V bow thruster motor (#108-01, Raboesch) inserted into the flume (Fig. 1b) and  
633 modulated by an inline rheostat between the Arduino and pump. Methylene blue tests indicated  
634 that the flow field was laminar, non-uniform, and stable after < 250 ms of pump onset (data not  
635 shown; Supplementary Fig. 3). The flow field had a lateral gradient along the Y-axis that was  
636 created by a minute boundary layer of null flow immediately adjacent to the walls and gradually  
637 increased (over ~2-5 mm, front to rear) until it became part of the freestream flow field (i.e., blue  
638 arrows in Supplementary Fig. 3).

639 The flume was placed onto a diffused array of 196 LEDs that emitted infrared (IR, 850  
640 nm) light up through a layer of diffusion material (several Kimwipes© sealed in plastic) and the  
641 translucent flume (Fig. 1b). A monochromatic high-speed camera (SC1 without IR filter,  
642 Edgertronic.com) with a 60 mm manual focus macro lens (Nikon) was placed on a tripod directly  
643 over the flume to record behavioral trials at  $f16$ , 1/1000 s, ISO 20000, and 60 or 200 frames  $s^{-1}$   
644 (fps). Videos were saved onto 64 GB SD cards and archived on a 12 TB RAID array (see  
645 below) All source files, scripts, details of apparatus construction, and SOP provided online in the  
646 Open Source Framework repository, DOI:10.17605/OSF.IO/RVYFZ.).

647

#### 648 *Lateral Line Isolation and Rheotaxis Trials*

649 To isolate the contribution of the lateral line to rheotaxis, we conducted the behavioral  
650 trials under infrared light to eliminate visual cues (Fig. 1a) and reduced linear acceleration cues  
651 to the vestibular system by using a flow stimulus that rapidly accelerated (< 250 ms) to a  
652 constant maximum velocity (9.74 mm  $s^{-1}$ ). Angular acceleration was not a factor because larval  
653 zebrafish at 6-7dpf cannot detect the angular motion of yaw in the horizontal plane (<sup>31, 32</sup>).  
654 Tactile cues were not possible to selectively block in a non-invasive manner.

655 The flume was filled with E3 media (28°C) and the arena placed within the flume. A  
656 thermometer was placed into the open portion of the flume to monitor heat generated by the IR  
657 lights and miniature ice packs (2 x 2 cm; -20°C) were used to maintain a consistent temperature  
658 range of 27-29°C. Under IR illumination, a single larval zebrafish was transferred by pipette from  
659 the 6-well plate to the arena within the flume. The swimming activity of the fish was monitored  
660 for ~10 s to ensure that it exhibited the burst-and-glide behavior indicative of normal larval  
661 zebrafish swimming (<sup>42</sup>). The Arduino was used to begin the trial by using a custom script that  
662 triggered the camera to record 10 s of baseline swimming behavior without flow then activate  
663 the pump and record 20 s of swimming behavior under flow. After 30 s had elapsed (no flow =  
664 0-10 s; initial flow = 10-20 s; and final flow = 20-30 s), the pump and camera turned off and the  
665 larvae was removed from the arena. Cohorts of five individual fish from each group (control,  
666 neomycin, or CuSO<sub>4</sub>) were tested before switching to a new group of fish. This process was  
667 repeated for up to four iterations during each experimental session (n = 15-20 fish per treatment  
668 per session) for a total of 18 sessions (control, n = 248; CuSO<sub>4</sub>, n = 204; neomycin, n = 222).

669

### 670 *3D Markerless Pose Estimation (DeepLabCut)*

671 *Equipment:* Our behavioral data acquisition and analysis computer ran on the Windows  
672 10 operating system and was based on a Dell Precision 3630 workstation with an Intel Xeon E-  
673 2246G processor, 64 GB RAM, multiple 2TB SSD hard drives, EVGA GFORCE RTX 2080Ti  
674 video card (GPU), dual 24" 4K monitors, Dell Thunderbolt 3 PCIe Card, OWC Mercury Elite Pro  
675 Dock (TB3RSDK24T) - 24TB Thunderbolt 3 Dock and Dual-Drive RAID configured as 12TB  
676 RAID 1.

677 *Installation:* Our GPU required Tensorflow 1.12 with the NVIDIA CUDA package to be  
678 installed prior to multi-animal DeepLabCut2.2b8 (maDLC; <sup>43, 44</sup>), Python 3.6, and necessary  
679 dependencies (<https://github.com/DeepLabCut/DeepLabCut/blob/master/docs/installation.md>).

680 Detailed tutorials for using maDLC with a single animal are available online  
681 ([https://github.com/DeepLabCut/DeepLabCut/blob/master/docs/maDLC\\_AdvUserGuide.md](https://github.com/DeepLabCut/DeepLabCut/blob/master/docs/maDLC_AdvUserGuide.md));  
682 however, the pertinent details of our procedure are as follows.

683 *Dataset Curation:* To reduce computational load, all video files were downsampled to  
684 1000 x 1000 px, dead pixels (i.e., black spots) and extraneous portions of the video were  
685 cropped out using the video editor function.

686 *Project Creation:* A single animal maDLC project was created and the project  
687 config.yaml file was modified to create and draw a skeleton interconnecting seven unique body  
688 parts (left and right eyes, swim bladder, four points along the tail; Fig. 1a) on each larva. A  
689 curated set of ten videos provided representative examples of target positive rheotaxis  
690 behaviors across experimental treatments, 20 frames were extracted from each video, and the  
691 seven body parts labeled on each frame. The annotated frames were checked for accuracy and  
692 multiple additional skeletal connections between the seven body parts were added to increase  
693 maDLC learning speed and model accuracy.

694 *Pose Estimation:* The training dataset used cropped images (400 x 400 px) to reduce  
695 computational loading, Resnet-50 pre-trained network weights, and imgaug data augmentation.  
696 We trained the network until all the loss parameters plateaued at 100,000 iterations then it was  
697 evaluated (PCK values close to 1, RMSE values low) and cross-validated using the default  
698 parameters.

699 *Identity Tracking:* The curated videos were analyzed, and the detections assembled into  
700 tracklets using the box method because it provided the best results for our test subjects. The  
701 original videos were overlaid with the newly labeled body parts to correct outliers and  
702 misidentification of body parts in the tracklet data files.

703 *Post Processing:* The results were plotted for each video and a new labeled video was  
704 created to double check for labeling accuracy and ensure there was no need to augment the

705 data set with additional labeled frames. Novel videos were batch processed and analyzed up  
706 through the plot trajectories and label videos step.

707

708 *Supervised Behavioral Annotation, Classification, & Analysis (SimBA)*

709 *Definition of Rheotaxis Behavior:* We created a custom Python feature extraction script  
710 (file online) that defined positive rheotaxis as when the larvae swam into the oncoming water  
711 flow at an angle of  $0^\circ \pm 45^\circ$  for at least 100 ms (Supplemental Fig. 1). The tail movement and  
712 forward body translation components were used to distinguish active swimming behavior into  
713 the flow from passive backward drift with a body angle of  $0^\circ \pm 45^\circ$ .

714 *Installation:* SimBAxTF-development version 68<sup>(45)</sup>, Python 3.6, Git, FFmpeg, and all  
715 dependencies. (<https://github.com/sgoldenlab/simba/blob/master/docs/installation.md>).

716 *Dataset Curation:* The pre-processed video files used for maDLC analysis were  
717 converted to AVI format using the SimBA video editor function.

718 *Project Creation:* A new SimBA project was created according to the Scenario 1 tutorial:  
719 (<https://github.com/sgoldenlab/simba/blob/master/docs/Scenario1.md>). The user defined pose  
720 configuration and DLC-multi animal options were selected prior to generating the project config  
721 file. The user-defined pose configuration nomenclature was modified to match the body part and  
722 individual animal labels used in the maDLC config.yaml file. A curated set of ten representative  
723 rheotaxis behavior videos from each treatment group, along with their associated final tracklet  
724 data files created by maDLC, were imported and their frames extracted.

725 *Load Project:* The project was loaded and the video parameters (frame rate (fps),  
726 resolution, and pixel measurements (px/mm)) set for each curated video. Outlier correction was  
727 achieved using the swim bladder and tail-3 body parts, movement criterion set to 0.7, and  
728 location criterion set to 1.5<sup>(45)</sup>. Features were extracted using the custom Python feature  
729 extraction script file. Rheotaxis behavior was labeled (i.e., annotations were created for

730 predictive classifiers) for each curated video, save one that was set aside for validation. The  
731 default training, hyperparameters, and evaluation settings were used to create the model <sup>(45)</sup>.  
732 Throughout the earmarked video, the interactive plot function was used to validate the model by  
733 determining the probability threshold for the accurate prediction and minimum duration of a  
734 rheotaxis event. These values became the discrimination threshold (0.5) and minimum behavior  
735 bout length (100 ms) settings used to run the machine model. Naïve videos were processed,  
736 behaviors annotated, and machine results data files archived for analysis.

737

### 738 *Data Analysis*

739 Rheotaxis only occurred when fish swam at angles  $0^\circ \pm 45^\circ$  under flow conditions;  
740 therefore, the rheotaxis data were compared to data when fish randomly swam at  $0^\circ \pm 45^\circ$   
741 under no flow. However, the entire 0-360° body angle datasets were used to determine if the  
742 fish from each treatment group were randomly distributed under no flow (Fig. 3), and to  
743 determine the X-Y (2D) spatial use under no flow (Fig. 6a) and flow (Fig. 6b) conditions. Time  
744 series of rheotaxis data sampled at 200 and 60 Hz (fps) were quantized into their lowest  
745 common bin size of 100 ms.

746 Data wrangling and cleaning was performed in R <sup>(46)</sup> with the packages *tidyverse* <sup>(47)</sup>,  
747 *dplyr* <sup>(48)</sup>, *plyr* <sup>(49)</sup>, and *readbulk* <sup>(50)</sup>. Figures and graphs were created with packages *circular*  
748 <sup>(51)</sup>, *ggplot2* <sup>(52)</sup>, and *viridis* <sup>(53)</sup>. The Rayleigh statistical tests (V-test) of uniformity for circular  
749 data in a specified mean direction ( $\mu = 0^\circ$ ) and the Watson-Wheeler tests for differences in the  
750 grand mean body angle or angular variance (the test does not specify which parameter differs)  
751 were performed with the package *CircMLE* <sup>(54)</sup>. The mean duration, number, total distance  
752 travelled and mean latency to the onset of rheotaxis events were calculated for 10 s bins (i.e.,  
753 none, initial, and final flow) using SimBA. These data were analyzed in R using the generalized  
754 linear mixed models (GLMM) and post hoc t-tests (Satterthwaite method) in the packages  
755 *lmerTest* <sup>(55)</sup> and *lme4* <sup>(56)</sup>. The significance values for fixed effects of these GLMM tests are not

756 reported by those packages and were run separately using the package *stats* <sup>(46)</sup> for type III  
757 ANOVAs. The package *zoo* <sup>(57)</sup> was used to convert rheotaxis data into times series and the  
758 package *spectral* <sup>(58)</sup> was used to perform the spectral decomposition analysis.

759

760 Declaration of interests:

761 The authors declare no competing financial or non-financial interests.

762

763 Acknowledgments: We want to thank Valentin Militchin for the design and construction of the  
764 electronic components of the experimental apparatus, David Lee for editorial support, and Mark  
765 Warchol for feedback on the manuscript. This work was supported by the National Institute on  
766 Deafness and Other Communication Disorders R01DC016066 (L.S.), NIDA R00DA045662  
767 (S.A.G.), NIDA P30 DA048736 (S.R.O.N. and S.A.G.), NARSAD Young Investigator Award  
768 27082 (S.A.G.).

769

770 Data Availability

771 The datasets generated and analyzed during the current study are available in the Open  
772 Science Framework repository, DOI 10.17605/OSF.IO/RVYFZ.

773

774 Code Availability

775 The R code generated for the analyses during the current study are available in the Open  
776 Science Framework repository, DOI 10.17605/OSF.IO/RVYFZ.

## 777 REFERENCES

- 778 1 Chagnaud, B. P. & Coombs, S. in *The Lateral Line System* (eds Sheryl Coombs, Horst  
779 Bleckmann, Richard R. Fay, & Arthur N. Popper) 151-194 (Springer New York, 2014).
- 780 2 Van Trump, W. J. & McHenry, M. J. The lateral line system is not necessary for  
781 rheotaxis in the Mexican blind cavefish (*Astyanax fasciatus*). *Integr Comp Biol* **53**, 799-  
782 809, doi:10.1093/icb/ict064 (2013).
- 783 3 Lyon, E. P. ON RHEOTROPISM. I. — RHEOTROPISM IN FISHES. *American Journal of*  
784 *Physiology-Legacy Content* **12**, 149-161, doi:10.1152/ajplegacy.1904.12.2.149 (1904).
- 785 4 ARNOLD, G. P. RHEOTROPISM IN FISHES. *Biological Reviews* **49**, 515-576,  
786 doi:<https://doi.org/10.1111/j.1469-185X.1974.tb01173.x> (1974).
- 787 5 Suli, A., Watson, G. M., Rubel, E. W. & Raible, D. W. Rheotaxis in larval zebrafish is  
788 mediated by lateral line mechanosensory hair cells. *PLoS One* **7**, e29727,  
789 doi:10.1371/journal.pone.0029727 (2012).
- 790 6 Pavlov, D. & Tyuryukov, S. The role of lateral-line organs and equilibrium in the behavior  
791 and orientation of the dace, *Leuciscus leuciscus*, in a turbulent flow. *JOURNAL OF*  
792 *ICHTHYOLOGY C/C OF VOPROSY IKHTIOLOGII* **33**, 45-45 (1993).
- 793 7 Pavlov, D. S. & Tjurjukov, S. N. Reactions of dace to linear accelerations. *Journal of Fish*  
794 *Biology* **46**, 768-774, doi:<https://doi.org/10.1111/j.1095-8649.1995.tb01600.x> (1995).
- 795 8 John C. Montgomery, C. F. B. A. G. C. The lateral line can mediate rheotaxis in fish.  
796 *Nature*, 960-963 (1997).
- 797 9 Baker, C. F. & Montgomery, J. C. Lateral line mediated rheotaxis in the Antarctic fish  
798 *Pagothenia borchgrevinki*. *Polar Biology* **21**, 305-309, doi:10.1007/s003000050366  
799 (1999).
- 800 10 Baker, C. F. & Montgomery, J. C. The sensory basis of rheotaxis in the blind Mexican  
801 cave fish, *Astyanax fasciatus*. *Journal of Comparative Physiology A* **184**, 519-527,  
802 doi:10.1007/s003590050351 (1999).
- 803 11 Dykgraaf, S. Untersuchungen über die Funktion der Seitenorgane an Fischen. *Zeitschrift*  
804 *für vergleichende Physiologie* **20**, 162-214, doi:10.1007/BF00340757 (1933).
- 805 12 Bak-Coleman, J., Court, A., Paley, D. A. & Coombs, S. The spatiotemporal dynamics of  
806 rheotactic behavior depends on flow speed and available sensory information. *J Exp Biol*  
807 **216**, 4011-4024, doi:10.1242/jeb.090480 (2013).
- 808 13 Coombs, S., Bak-Coleman, J. & Montgomery, J. Rheotaxis revisited: a multi-behavioral  
809 and multisensory perspective on how fish orient to flow. *J Exp Biol* **223**,  
810 doi:10.1242/jeb.223008 (2020).
- 811 14 Coffin, A. B., Brignull, H., Raible, D. W. & Rubel, E. W. in *The Lateral Line System* (eds  
812 Sheryl Coombs, Horst Bleckmann, Richard R. Fay, & Arthur N. Popper) 313-347  
813 (Springer New York, 2014).
- 814 15 Harris, J. A. *et al.* Neomycin-Induced Hair Cell Death and Rapid Regeneration in the  
815 Lateral Line of Zebrafish (*Danio rerio*). *Journal of the Association for Research in*  
816 *Otolaryngology* **4**, 219-234, doi:10.1007/s10162-002-3022-x (2003).
- 817 16 Ma, E. Y., Rubel, E. W. & Raible, D. W. Notch Signaling Regulates the Extent of Hair  
818 Cell Regeneration in the Zebrafish Lateral Line. *The Journal of Neuroscience* **28**, 2261-  
819 2273, doi:10.1523/jneurosci.4372-07.2008 (2008).
- 820 17 Hardy, K. *et al.* Functional development and regeneration of hair cells in the zebrafish  
821 lateral line. *J Physiol* **599**, 3913-3936, doi:10.1113/JP281522 (2021).
- 822 18 Kniss, J. S., Jiang, L. & Piotrowski, T. Insights into sensory hair cell regeneration from  
823 the zebrafish lateral line. *Current Opinion in Genetics & Development* **40**, 32-40,  
824 doi:<https://doi.org/10.1016/j.gde.2016.05.012> (2016).



- 825 19 Pickett, S. B. & Raible, D. W. Water Waves to Sound Waves: Using Zebrafish to Explore  
826 Hair Cell Biology. *J Assoc Res Otolaryngol* **20**, 1-19, doi:10.1007/s10162-018-00711-1  
827 (2019).
- 828 20 Olive, R. *et al.* Rheotaxis of Larval Zebrafish: Behavioral Study of a Multi-Sensory  
829 Process. *Front Syst Neurosci* **10**, 14, doi:10.3389/fnsys.2016.00014 (2016).
- 830 21 Olszewski, J., Haehnel, M., Taguchi, M. & Liao, J. C. Zebrafish larvae exhibit rheotaxis  
831 and can escape a continuous suction source using their lateral line. *PLoS One* **7**,  
832 e36661, doi:10.1371/journal.pone.0036661 (2012).
- 833 22 Oteiza, P., Odstrcil, I., Lauder, G., Portugues, R. & Engert, F. A novel mechanism for  
834 mechanosensory-based rheotaxis in larval zebrafish. *Nature* **547**, 445-448,  
835 doi:10.1038/nature23014 (2017).
- 836 23 Hernández, P. P., Moreno, V., Olivari, F. A. & Allende, M. L. Sub-lethal concentrations of  
837 waterborne copper are toxic to lateral line neuromasts in zebrafish (*Danio rerio*). *Hearing*  
838 *Research* **213**, 1-10, doi:<https://doi.org/10.1016/j.heares.2005.10.015> (2006).
- 839 24 Linbo, T. L., Stehr, C. M., Incardona, J. P. & Scholz, N. L. Dissolved copper triggers cell  
840 death in the peripheral mechanosensory system of larval fish. *Environmental Toxicology*  
841 *and Chemistry* **25**, 597-603, doi:<https://doi.org/10.1897/05-241R.1> (2006).
- 842 25 Olivari, F. A., Hernández, P. P. & Allende, M. L. Acute copper exposure induces  
843 oxidative stress and cell death in lateral line hair cells of zebrafish larvae. *Brain*  
844 *Research* **1244**, 1-12, doi:<https://doi.org/10.1016/j.brainres.2008.09.050> (2008).
- 845 26 Williams, J. A. & Holder, N. Cell turnover in neuromasts of zebrafish larvae. *Hearing*  
846 *Research* **143**, 171-181, doi:[https://doi.org/10.1016/S0378-5955\(00\)00039-3](https://doi.org/10.1016/S0378-5955(00)00039-3) (2000).
- 847 27 Coffin, A. B., Rubel, E. W. & Raible, D. W. Bax, Bcl2, and p53 differentially regulate  
848 neomycin- and gentamicin-induced hair cell death in the zebrafish lateral line. *J Assoc*  
849 *Res Otolaryngol* **14**, 645-659, doi:10.1007/s10162-013-0404-1 (2013).
- 850 28 Buck, L. M., Winter, M. J., Redfern, W. S. & Whitfield, T. T. Ototoxin-induced cellular  
851 damage in neuromasts disrupts lateral line function in larval zebrafish. *Hear Res* **284**,  
852 67-81, doi:10.1016/j.heares.2011.12.001 (2012).
- 853 29 Bak-Coleman, J. & Coombs, S. Sedentary behavior as a factor in determining lateral line  
854 contributions to rheotaxis. *J Exp Biol* **217**, 2338-2347, doi:10.1242/jeb.102574 (2014).
- 855 30 Elder, J. & Coombs, S. The influence of turbulence on the sensory basis of rheotaxis. *J*  
856 *Comp Physiol A Neuroethol Sens Neural Behav Physiol* **201**, 667-680,  
857 doi:10.1007/s00359-015-1014-7 (2015).
- 858 31 Beck, J. C., Gilland, E., Tank, D. W. & Baker, R. Quantifying the Ontogeny of Optokinetic  
859 and Vestibuloocular Behaviors in Zebrafish, Medaka, and Goldfish. *Journal of*  
860 *Neurophysiology* **92**, 3546-3561, doi:10.1152/jn.00311.2004 (2004).
- 861 32 Mo, W., Chen, F., Nechiporuk, A. & Nicolson, T. Quantification of vestibular-induced eye  
862 movements in zebrafish larvae. *BMC Neurosci* **11**, 110, doi:10.1186/1471-2202-11-110  
863 (2010).
- 864 33 Liao, J. C. The role of the lateral line and vision on body kinematics and hydrodynamic  
865 preference of rainbow trout in turbulent flow. *J Exp Biol* **209**, 4077-4090,  
866 doi:10.1242/jeb.02487 (2006).
- 867 34 Hernandez, P. P. *et al.* Sublethal concentrations of waterborne copper induce cellular  
868 stress and cell death in zebrafish embryos and larvae. *Biological Research* **44**, 7-15  
869 (2011).
- 870 35 Toro, C. *et al.* Dopamine Modulates the Activity of Sensory Hair Cells. *J Neurosci* **35**,  
871 16494-16503, doi:10.1523/JNEUROSCI.1691-15.2015 (2015).
- 872 36 Zhang, Q. *et al.* Synaptically silent sensory hair cells in zebrafish are recruited after  
873 damage. *Nat Commun* **9**, 1388, doi:10.1038/s41467-018-03806-8 (2018).

- 874 37 Johansen, J. L., Fulton, C. J. & Bellwood, D. R. Avoiding the flow: refuges expand the  
875 swimming potential of coral reef fishes. *Coral Reefs* **26**, 577-583, doi:10.1007/s00338-  
876 007-0217-y (2007).
- 877 38 Webb, P. W. Entrainment by river chub nocomis micropogon and smallmouth bass  
878 micropterus dolomieu on cylinders. *J Exp Biol* **201 (Pt 16)**, 2403-2412 (1998).
- 879 39 Burt de Perera, T. B. & Braithwaite, V. A. Laterality in a non-visual sensory modality--the  
880 lateral line of fish. *Curr Biol* **15**, R241-242, doi:10.1016/j.cub.2005.03.035 (2005).
- 881 40 Nusslein-Volhard, C. & Dahm, R. *Zebrafish*. (Oxford University Press, 2002).
- 882 41 Han, E. et al (2020) Analysis of behavioral changes in zebrafish (*Danio rerio*) larvae  
883 caused by aminoglycoside-induced damage to the lateral line and muscles.  
884 *Neurotoxicology* **78**, 134-142, doi: 10.1016/j.neuro.2020.03.005
- 885 42 Budick, S. A. & O'Malley, D. M. Locomotor repertoire of the larval zebrafish: swimming,  
886 turning and prey capture. *Journal of Experimental Biology* **203**, 2565-2579,  
887 doi:10.1242/jeb.203.17.2565 (2000).
- 888 43 Mathis, A. et al. DeepLabCut: markerless pose estimation of user-defined body parts  
889 with deep learning. *Nature Neuroscience* **21**, 1281-1289, doi:10.1038/s41593-018-0209-  
890 y (2018).
- 891 44 Nath, T. et al. Using DeepLabCut for 3D markerless pose estimation across species and  
892 behaviors. *Nature Protocols* **14**, 2152-2176, doi:10.1038/s41596-019-0176-0 (2019).
- 893 45 Nilsson, S. R. O. et al., doi:10.1101/2020.04.19.049452 (2020).
- 894
- 895 46 R Core Team (2020). R: A language and environment for statistical computing. R  
896 Foundation for Statistical Computing, Vienna, Austria. URL <https://www.R-project.org/>.
- 897 47 Wickham et al., (2019). Welcome to the tidyverse. *Journal of Open Source Software*,  
898 4(43), 1686, <https://doi.org/10.21105/joss.01686>
- 899 48 Wickham, H., François, R., Henry, L., and Müller, K. (2021). dplyr: A Grammar of Data  
900 Manipulation. R package version 1.0.3. <https://CRAN.R-project.org/package=dplyr>
- 901 49 Wickham, H. (2011). The Split-Apply-Combine Strategy for Data Analysis. *Journal of*  
902 *Statistical Software*, 40(1), 1-29. URL <http://www.jstatsoft.org/v40/i01/>.
- 903 50 Kieslich, P. J., and Henninger, F. (2016). Readbulk: An R package for reading and  
904 combining multiple data files. <https://doi.org/10.5281/zenodo.596649>
- 905 51 Agostinelli C. and Lund, U. (2017). R package 'circular': Circular Statistics (version 0.4-  
906 93). URL <https://r-forge.r-project.org/projects/circular/>
- 907 52 Wickham, H. ggplot2: Elegant Graphics for Data Analysis. Springer-Verlag New York,  
908 2016.
- 909 53 Garnier, S. (2018). viridis: Default Color Maps from 'matplotlib'. R package version  
910 0.5.1. <https://CRAN.R-project.org/package=viridis>
- 911 54 Fitak, R. R. and Johnsen, S. (2017). Bringing the analysis of animal orientation data full  
912 circle: model-based approaches with maximum likelihood. *Journal of Experimental*  
913 *Biology*, 220, 3878-3882. doi:10.1242/jeb.167056
- 914 55 Kuznetsova A, Brockhoff PB, Christensen RHB (2017). "lmerTest Package: Tests in  
915 Linear Mixed Effects Models." *Journal of Statistical Software*, 82(13), 1-26. doi:  
916 10.18637/jss.v082.i13 (URL:<https://doi.org/10.18637/jss.v082.i13>).
- 917 56 Bates, D., Maechler, M., Bolker, B., Walker, S. (2015). Fitting Linear Mixed-Effects  
918 Models Using lme4. *Journal of Statistical Software*, 67(1), 1-48.  
919 doi:10.18637/jss.v067.i01.
- 920 57 Zeileis, A. and Grothendieck, G. (2005). zoo: S3 Infrastructure for Regular and Irregular  
921 Time Series. *Journal of Statistical Software*, 14(6), 1-27. doi:10.18637/jss.v014.i06
- 922 58 Seilmayer, M. (2021). spectral: Common Methods of Spectral Data Analysis. R package  
923 version 2.0. <https://CRAN.R-project.org/package=spectral>
- 924

925 **SUPPLEMENTARY INFORMATION**

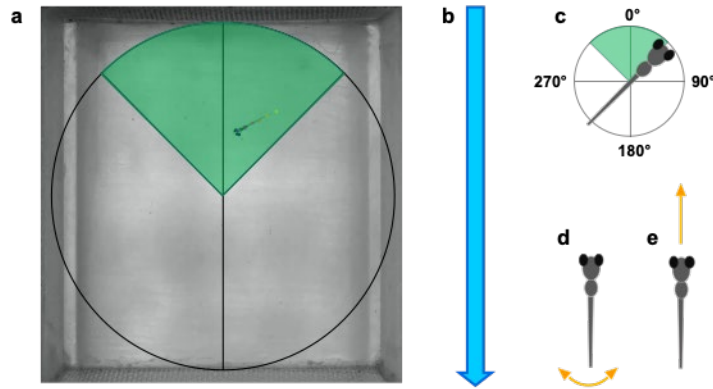

926

927 **Supplementary Figure 1. Definition of positive rheotaxis behavior.** a) Larval zebrafish in the microflume arena performing  
928 rheotaxis under flow as defined by multiple conditions, including b) the water flow stimulus was on; c) the fish body angle was  
929 oriented to  $0^\circ \pm 45^\circ$  (green shaded wedge); d) the tail moved laterally every 100 ms; and e) the body of the fish had forward  
930 translation every 100 ms. Note that conditions (d) and (e) were used to discriminate between fish displaying positive rheotaxis and  
931 those passively drifting backward with body angles of  $0^\circ \pm 45^\circ$ .

932

933

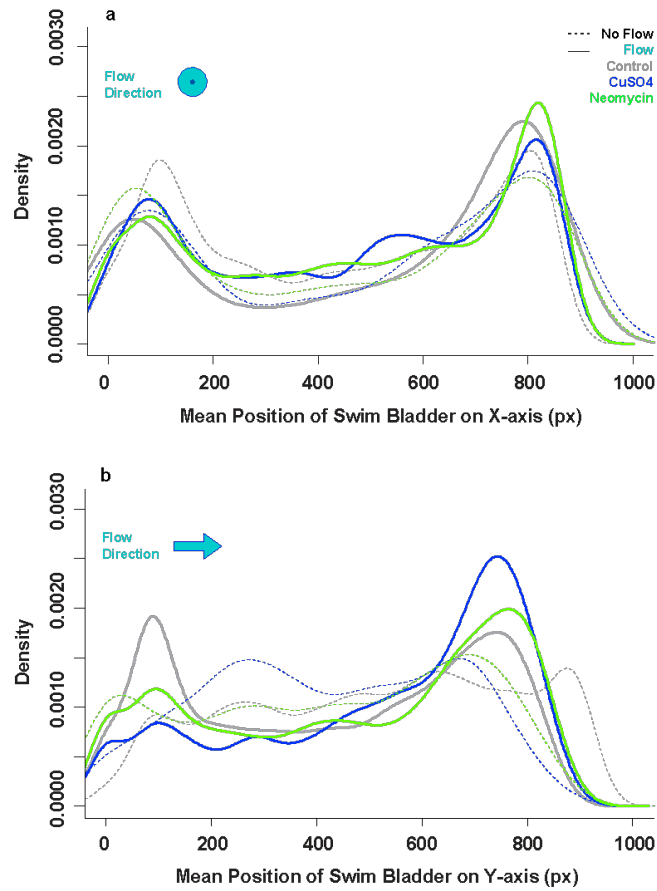

934

935 **Supplemental Figure 2. Intact lateral line allowed fish to hold their position near the source of the flow.** a) The total spatial

936 use of the arena in the X- dimension (left to right) does not differ among treatments (gray = control, blue = CuSO<sub>4</sub>, green =

937 neomycin) or flow conditions (none = dotted lines, flow = solid lines). All fish preferred to occupy the right versus the left side of the

938 arena. b) in the Y- dimension (front to back) under no flow conditions, the CuSO<sub>4</sub> treated fish occupied the center of the arena more

939 than the control or neomycin treated fish. However, under flow conditions, the lateral line intact (control; gray solid line) fish occupied

940 the front of the arena, whereas lesioned fish (blue and green solids lines) predominantly occupied the back of the arena.

941

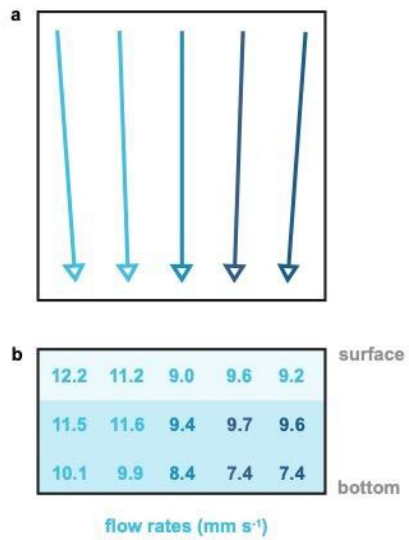

942

943 **Supplementary Figure 3. Visualization of methylene blue dye tests within the experimental arena shows a laminar yet non-**  
944 **uniform flow field.** a) The vectors are color coded according to the mean of the b) cross-sectional flow values ( $\text{mm s}^{-1}$ ) from top to  
945 bottom. Each cross-sectional flow value (b) is the mean of five trials. Fish typically occupied the dark shaded area in the bottom two-  
946 thirds of the water column and very rarely swam near the surface.

947

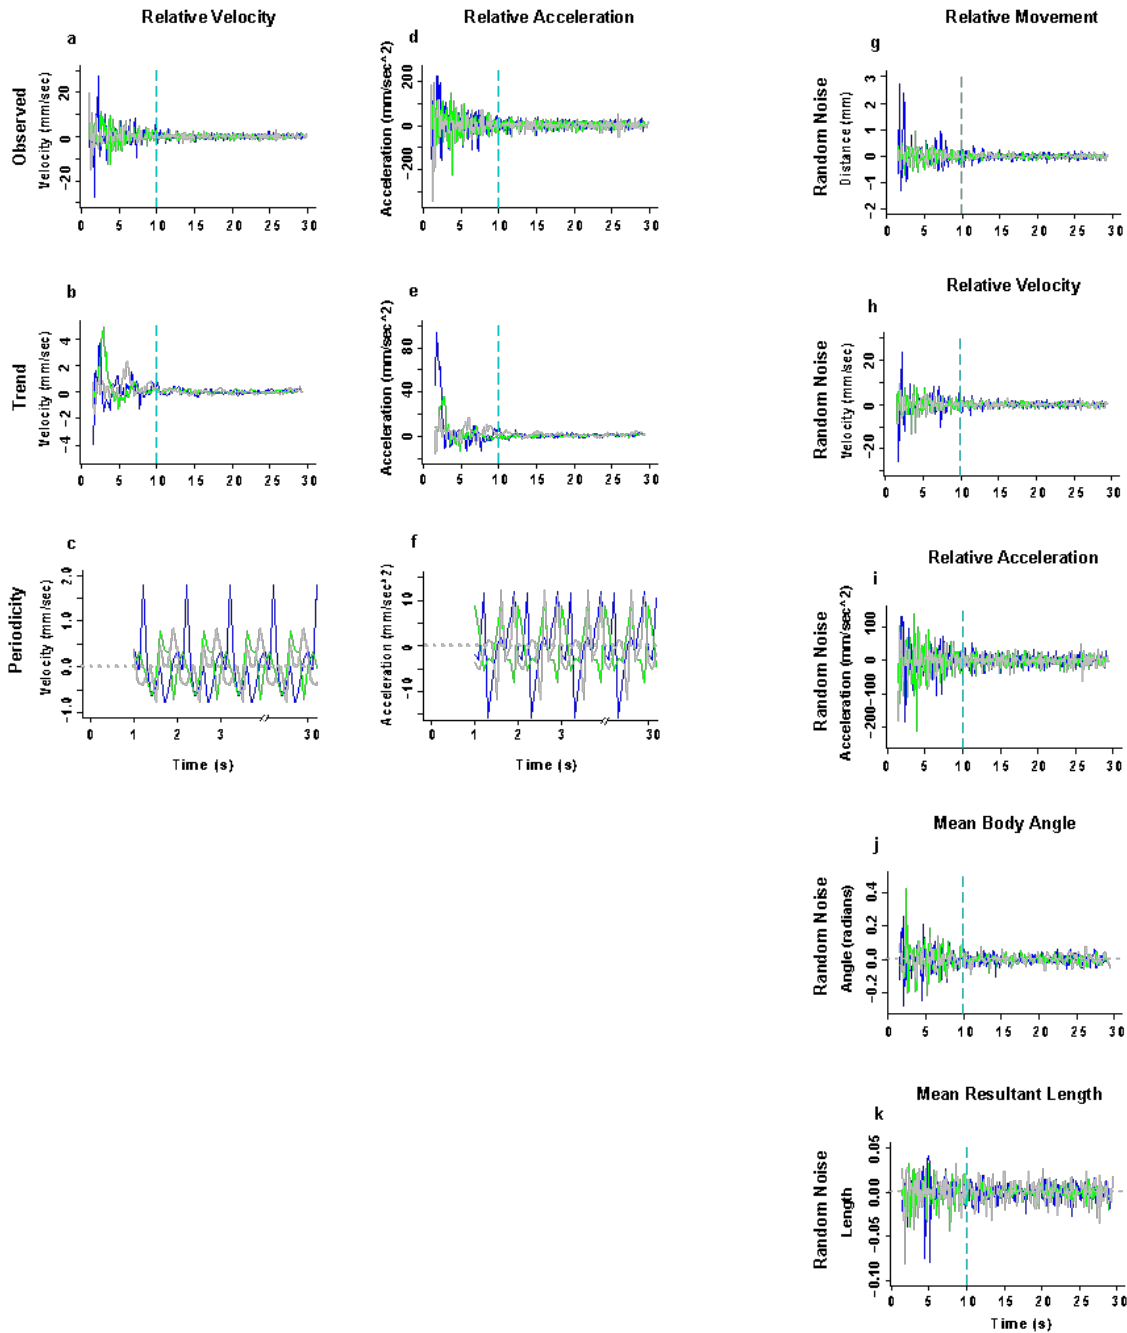

948

949 **Supplementary Figure 4. The overall trends and periodic fluctuations in the relative velocity and acceleration in rheotaxis**  
 950 **behavior differed among treatment groups.** Gray = control (n = 248), blue = CuSO<sub>4</sub> (n = 204), green = neomycin (n = 222).  
 951 Spectral decomposition of the observed data (a, d) removed the noise (h, i) to reveal the overall underlying trends (b, e) and the  
 952 periodicity, or recurring fluctuations (c, f) that occurred during any given 1 s of the experiment. The periodicity waveform peaks  
 953 indicate the average amount (amplitude), number, direction (positive = increasing; negative = decreasing), and order of occurrence  
 954 for these cyclic fluctuations as a function of unit time (1 s). The overall trends were that there were no differences in relative (b)  
 955 velocity or (e) acceleration among groups. The periodic fluctuation in relative velocity (c) and acceleration (f) was greatest in CuSO<sub>4</sub>  
 956 treated fish compared to control or neomycin treated fish. The noise for relative movement (g), mean body angle (j), and mean  
 957 resultant length (k) are shown.

958

|                   | No Flow Stimulus<br>1-10s<br><i>theta, rho, ang var</i> | Flow Stimulus<br>11-20s<br><i>theta, rho, ang var</i> | Flow Stimulus<br>21-30s<br><i>theta, rho, ang var</i> |
|-------------------|---------------------------------------------------------|-------------------------------------------------------|-------------------------------------------------------|
| Control           | 135.5°<br>0.084<br>0.916                                | 357.9°<br>0.687<br>0.313                              | 1.7°<br>0.688<br>0.312                                |
| CuSO <sub>4</sub> | 84.8 °<br>0.099<br>0.901                                | 10.8°<br>0.530<br>0.470                               | 3.1°<br>0.611<br>0.389                                |
| Neomycin          | 86.7°<br>0.090<br>0.900                                 | 6.1°<br>0.656<br>0.344                                | 6.7°<br>0.655<br>0.345                                |

959

960

961

962

963

964

965

**Supplementary Table 1.** Grand mean body angle vector parameters. *Theta* = group mean body angle; *rho* = mean length of resultant vector, where 0 = uniform distribution of individual mean body angles, 1 = perfect alignment individual mean body angles; angular variance =  $1-\rho$ .

|                   | No Flow Stimulus<br>1-10s<br>test stat, p-value | Flow Stimulus<br>11-20s<br>test stat, p-value | Flow Stimulus<br>21-30s<br>test stat, p-value |
|-------------------|-------------------------------------------------|-----------------------------------------------|-----------------------------------------------|
| Control           | -0.0595<br>0.9079                               | 0.686<br><b>&lt; 0.001</b>                    | 0.6678<br><b>&lt; 0.001</b>                   |
| CuSO <sub>4</sub> | 0.009<br>0.4276                                 | 0.5204<br><b>&lt; 0.001</b>                   | 0.6105<br><b>&lt; 0.001</b>                   |
| Neomycin          | 0.0052<br>0.4566                                | 0.6522<br><b>&lt; 0.001</b>                   | 0.6507<br><b>&lt; 0.001</b>                   |

966

967

968

969

970

971

**Supplementary Table 2.** Rayleigh test of uniformity (V-test) for an expected grand mean body angle,  $\mu = 0^\circ$ . Among all treatments, groups under no flow were not significantly aligned to  $0^\circ$ , whereas groups under flow conditions were significantly aligned to  $0^\circ$ .



972

|                      | CTL-10s<br>p-value | CTL-20s<br>p-value | Cu-10s<br>p-value | Cu-20s<br>p-value | Neo-10s<br>p-value | Neo-20s<br>p-value |
|----------------------|--------------------|--------------------|-------------------|-------------------|--------------------|--------------------|
| CTL-10s<br>test stat | -                  | 0.4747             | <b>2.58e-05</b>   | 0.119             | <b>0.0357</b>      | >0.10              |
| CTL-20s<br>test stat | 1.49               | -                  | <b>7.041e-05</b>  | <b>0.0508</b>     | 0.07419            | 0.4502             |
| Cu-10s<br>test stat  | 21.128             | 19.122             | -                 | 0.04975           | 0.05861            | <b>0.0090</b>      |
| Cu-20s<br>test stat  | 4.2573             | 5.9597             | 6.0014            | -                 | 0.311              | 0.1921             |
| Neo-10s<br>test stat | 6.6655             | 5.2022             | 5.6737            | 2.3357            | -                  | 0.7364             |
| Neo-20s<br>test stat | 0.1251             | 1.5961             | 9.4268            | 3.3000            | 0.61196            | -                  |

973

974

975

976

**Supplementary Table 3.** Watson Wheeler test for differences in either grand mean body angle or the distribution of the individual mean angles (*the test does not specify*) among treatment groups under flow conditions.

977

| GLMM                                          | Estimate | Std. Error | df   | t value | Pr(> t )              |
|-----------------------------------------------|----------|------------|------|---------|-----------------------|
| Stimulus (No flow v Flow 10s)                 | 1.14950  | 0.10746    | 1390 | 10.697  | <b>&lt; 2e-16 ***</b> |
| Stimulus (No flow v Flow 20s)                 | 1.62296  | 0.10746    | 1390 | 15.102  | <b>&lt; 2e-16 ***</b> |
| Treatment (Control v CuSO <sub>4</sub> )      | 0.05485  | 0.11893    | 2068 | 0.461   | 0.64473               |
| Treatment (Control v Neomycin)                | 0.04574  | 0.11507    | 2068 | 0.398   | 0.69103               |
| Stim*Treat (CTL-10s v CuSO <sub>4</sub> -10s) | -0.34246 | 0.16277    | 1390 | -2.104  | <b>0.03556 *</b>      |
| Stim*Treat (CTL-20s v CuSO <sub>4</sub> -20s) | -0.45260 | 0.16277    | 1390 | -2.781  | <b>0.00550 **</b>     |
| Stim*Treat (CTL-10s v Neo-10s)                | -0.29562 | 0.15749    | 1390 | -1.877  | <b>0.06072 .</b>      |
| Stim*Treat (CTL-20s v Neo-20s)                | -0.36519 | 0.15749    | 1390 | -2.319  | <b>0.02055 *</b>      |

978

| ANOVA (III) | Sum Sq | Mean Sq | NumDF | DenDF | F value  | Pr(>F)                  |
|-------------|--------|---------|-------|-------|----------|-------------------------|
| Stimulus    | 660.88 | 330.44  | 2     | 1390  | 216.7689 | <b>&lt; 2.2e-16 ***</b> |
| Treatment   | 29.83  | 14.92   | 2     | 695   | 9.7842   | <b>6.449e-05 ***</b>    |
| Stim*Treat  | 15.40  | 3.85    | 4     | 1390  | 2.5249   | <b>0.03926 *</b>        |

979

980

981

982

983

**Supplementary Table 4.** Generalized Linear Mixed Model with Satterthwaite's method of testing for differences among treatments in the mean duration of rheotaxis events. Type III ANOVA yielded significance values for fixed effects and interactions because the LME4 package in R does not identify them in its output. Significance codes: '\*\*\*' 0.001, '\*\*' 0.01, '\*' 0.05, '.' 0.1

984

| GLMM                                          | Estimate | Std. Error | df   | t value | Pr(> t )    |
|-----------------------------------------------|----------|------------|------|---------|-------------|
| Stimulus (No flow v Flow 10s)                 | 2.65530  | 0.15538    | 1390 | 17.089  | < 2e-16 *** |
| Stimulus (No flow v Flow 20s)                 | 2.91667  | 0.15538    | 1390 | 18.771  | < 2e-16 *** |
| Treatment (Control v CuSO <sub>4</sub> )      | -0.52696 | 0.21170    | 1614 | -2.489  | 0.0129 *    |
| Treatment (Control v Neomycin)                | 0.46123  | 0.20484    | 1614 | 2.252   | 0.0245 *    |
| Stim*Treat (CTL-10s v CuSO <sub>4</sub> -10s) | -0.57687 | 0.23535    | 1390 | -2.451  | 0.0144 *    |
| Stim*Treat (CTL-20s v CuSO <sub>4</sub> -20s) | 0.05882  | 0.23535    | 1390 | 0.250   | 0.8027      |
| Stim*Treat (CTL-10s v Neo-10s)                | 0.09687  | 0.22772    | 1390 | 0.425   | 0.6706      |
| Stim*Treat (CTL-20s v Neo-20s)                | 0.05290  | 0.22772    | 1390 | 0.232   | 0.8163      |

985

| ANOVA (III) | Sum Sq | Mean Sq | NumDF | DenDF | F value  | Pr(>F)        |
|-------------|--------|---------|-------|-------|----------|---------------|
| Stimulus    | 3488.9 | 1744.46 | 2     | 1390  | 547.3568 | < 2.2e-16 *** |
| Treatment   | 167.1  | 83.57   | 2     | 695   | 26.2224  | 1.049e-11 *** |
| Stim*Treat  | 40.0   | 9.99    | 4     | 1390  | 3.1356   | 0.01403 *     |

986

987

988

989

990

**Supplementary Table 5.** Generalized Linear Mixed Model with Satterthwaite's method of testing for differences among treatments in the mean number of rheotaxis events. Type III ANOVA yielded significance values for fixed effects and interactions because the LME4 package in R does not identify them in its output. Significance codes: '\*\*\*\*' 0.001, '\*\*\*' 0.01, '\*\*' 0.05, '.' 0.1

991

| GLMM                                        | Estimate | Std. Error | df   | t value | Pr(> t )            |
|---------------------------------------------|----------|------------|------|---------|---------------------|
| Stimulus (No flow<br>v Flow 10s)            | 0.70177  | 0.16338    | 1721 | 4.295   | <b>1.84e-05 ***</b> |
| Stimulus (No flow<br>v Flow 20s)            | 0.65449  | 0.16338    | 1721 | 4.006   | <b>6.44e-05 ***</b> |
| Treatment (Control<br>v CuSO <sub>4</sub> ) | 0.18141  | 0.11436    | 695  | 1.586   | 0.11313             |
| Treatment (Control<br>v Neomycin)           | 0.30691  | 0.11102    | 706  | 2.764   | <b>0.00585 **</b>   |

992

| ANOVA (III) | Sum Sq  | Mean Sq | NumDF | DenDF | F value | Pr(>F)                  |
|-------------|---------|---------|-------|-------|---------|-------------------------|
| Stimulus    | 243.652 | 81.037  | 2     | 1565  | 38.8494 | <b>&lt; 2.2e-16 ***</b> |
| Treatment   | 8.117   | 3.796   | 2     | 699   | 3.8913  | <b>0.02086 *</b>        |

993

994

995

996

997

998

**Supplementary Table 6.** Generalized Linear Mixed Model with Satterthwaite's method of testing for differences among treatments in the total distance travelled during rheotaxis events. GLMM model had no interaction between stimulus and treatment. Type III ANOVA yielded significance values for fixed effects because the LME4 package in R does not identify them in its output. Significance codes: '\*\*\*' 0.001, '\*\*' 0.01, '\*' 0.05, '.' 0.1

999

| GLMM                                          | Estimate   | Std. Error | df        | t value | Pr(> t )     |
|-----------------------------------------------|------------|------------|-----------|---------|--------------|
| Stimulus (No flow v Flow 10s)                 | 8.460e+00  | 3.333e-01  | 2.085e+03 | 25.386  | < 2e-16 ***  |
| Stimulus (No flow v Flow 20s)                 | 1.762e+01  | 3.333e-01  | 2.085e+03 | 52.882  | < 2e-16 ***  |
| Treatment (Control v CuSO <sub>4</sub> )      | -1.384e+00 | 3.569e-01  | 2.085e+03 | -3.877  | 0.000109 *** |
| Treatment (Control v Neomycin)                | 8.802e-03  | 2.085e+03  | 2.085e+03 | 0.025   | 0.979669     |
| Stim*Treat (CTL-10s v CuSO <sub>4</sub> -10s) | .904e-01   | 5.048e-01  | 2.085e+03 | 0.972   | 0.331412     |
| Stim*Treat (CTL-20s v CuSO <sub>4</sub> -20s) | 1.015e+00  | 5.048e-01  | 2.085e+03 | 2.011   | 0.044503 *   |
| Stim*Treat (CTL-10s v Neo-10s)                | -4.100e-02 | 4.884e-01  | 2.085e+03 | -0.084  | 0.933106     |
| Stim*Treat (CTL-20s v Neo-20s)                | 8.078e-02  | 4.884e-01  | 2.085e+03 | 0.165   | 0.868645     |

1000

| ANOVA (III) | Sum Sq | Mean Sq | NumDF | DenDF | F value  | Pr(>F)        |
|-------------|--------|---------|-------|-------|----------|---------------|
| Stimulus    | 112476 | 56238   | 2     | 2089  | 3834.664 | < 2.2e-16 *** |
| Treatment   | 345    | 173     | 2     | 2089  | 11.764   | 8.306e-06 *** |

1001

1002

1003

1004

1005

1006

**Supplementary Table 7.** Generalized Linear Mixed Model with Satterthwaite's method of testing for differences among treatments in the mean latency to the onset of first rheotaxis event. GLMM model had no interaction between stimulus and treatment. Type III ANOVA yielded significance values for fixed effects and interactions because the LME4 package in R does not identify them in its output. Significance codes: '\*\*\*' 0.001, '\*\*' 0.01, '\*' 0.05, '.' 0.1

| GLM                                                       | Estimate | Std. Error | t value | Pr(> t )            |
|-----------------------------------------------------------|----------|------------|---------|---------------------|
| Treatment (Control v<br><b>CuSO<sub>4</sub></b> )         | 31.9668  | 4.4820     | 7.132   | <b>1.21e-12 ***</b> |
| Treatment (Control v<br><b>Neomycin</b> )                 | 14.6849  | 4.0870     | 3.593   | <b>0.000332 ***</b> |
| ROI (Back v Center)                                       | 4.6943   | 4.7014     | 0.998   | 0.318122            |
| ROI (Back v Front)                                        | -6.3503  | 4.7014     | -1.351  | 0.176878            |
| ROI (Back v Left)                                         | -13.8344 | 4.7014     | -2.943  | <b>0.003278 **</b>  |
| ROI (Back v Right)                                        | 7.7325   | 4.7014     | -1.645  | 0.100126            |
| ROI*Treat (CTL-Back v<br><b>CuSO<sub>4</sub>-Center</b> ) | 10.2432  | 6.3386     | 1.616   | 0.106188            |
| ROI*Treat (CTL-Back v<br><b>Neo-Center</b> )              | 733.35   | 5.7799     | 3.287   | <b>0.001023 **</b>  |
| ROI*Treat (CTL-Back v<br><b>CuSO<sub>4</sub>-Front</b> )  | 18.9995  | 6.3386     | -4.265  | <b>2.05e-05 ***</b> |
| ROI*Treat (CTL-Back v<br><b>Neo-Front</b> )               | -27.0351 | 5.7799     | 0.146   | 0.884161            |
| ROI*Treat (CTL-Back v<br><b>CuSO<sub>4</sub>-Left</b> )   | -23.8271 | 6.3386     | -3.759  | <b>0.000174 ***</b> |
| ROI*Treat (CTL-Back v<br><b>Neo-Left</b> )                | -13.3969 | 5.7799     | -2.318  | <b>0.020519 *</b>   |
| ROI*Treat (CTL-Back v<br><b>CuSO<sub>4</sub>-Right</b> )  | -21.5175 | 6.3386     | -3.395  | <b>0.000695 ***</b> |
| ROI*Treat (CTL-Back v<br><b>Neo-Right</b> )               | -10.7854 | 5.7799     | -1.866  | <b>0.062127 .</b>   |

1007

| ANOVA (III)   | Sum Sq | Mean Sq | Df | F value | Pr(>F)                  |
|---------------|--------|---------|----|---------|-------------------------|
| Treatment     | 172565 | 86283   | 2  | 49.727  | <b>&lt; 2.2e-16 ***</b> |
| ROI           | 778750 | 194687  | 4  | 112.204 | <b>&lt; 2.2e-16 ***</b> |
| Treatment*ROI | 135133 | 16892   | 8  | 9.735   | <b>1.93e-13 ***</b>     |

1008

1009

1010

1011

1012

**Supplementary Table 8.** Generalized Linear Model tests for differences in the two-dimensional X-Y spatial use among treatments. GLM model included fixed effects of stimulus and treatment, and the effect of the interaction between stimulus and treatment. ANOVA yielded significance values for fixed effects and interactions because the LME4 package in R does not identify them in its output. Significance codes: '\*\*\*' 0.001, '\*\*' 0.01, '\*' 0.05, '.' 0.1

|          | Control  | Control | Control | CuSO <sub>4</sub> | CuSO <sub>4</sub> | CuSO <sub>4</sub> | Cu-Ctl  | Cu-Ctl             | Neomycin | Neomycin | Neomycin | Neo-Ctl | Neo-Ctl            |
|----------|----------|---------|---------|-------------------|-------------------|-------------------|---------|--------------------|----------|----------|----------|---------|--------------------|
| Variable | Min      | Max     | Range   | Min               | Max               | Range             | ΔRange  | ΔRange<br>(factor) | Min      | Max      | Range    | ΔRange  | ΔRange<br>(factor) |
| mov      | -0.0431  | 0.0583  | 0.1014  | -0.0724           | 0.1547            | 0.2270            | 0.1257  | <b>2.2400</b>      | -0.0414  | 0.0441   | 0.0855   | -0.0158 | <i>0.8437</i>      |
| vel      | -0.7762  | 0.8416  | 1.6178  | -0.7991           | 1.7910            | 2.5900            | 0.9723  | <b>1.6010</b>      | -0.7129  | 0.7997   | 1.5126   | -0.1051 | <i>0.9350</i>      |
| acc      | -11.8950 | 12.3300 | 24.2250 | -15.8962          | 12.1951           | 28.0914           | 3.8664  | <b>1.1596</b>      | -8.1738  | 9.7733   | 17.9471  | -6.2779 | <i>0.7409</i>      |
| angle    | -0.0158  | 0.0107  | 0.0265  | -0.0087           | 0.0145            | 0.0231            | -0.0034 | <i>0.8729</i>      | -0.0162  | 0.0256   | 0.0418   | 0.0153  | <b>1.5766</b>      |
| res L    | -0.0052  | 0.0075  | 0.0127  | -0.0038           | 0.0023            | 0.0061            | -0.0066 | <i>0.4832</i>      | -0.0026  | 0.0028   | 0.0054   | -0.0074 | <i>0.4219</i>      |

**Supplementary Table 9** (Based on Fig. 8c, g, k, o, s). Lateral line ablation by drug treatment (Cu, Neo) shifts the range in overall amplitude of linear (*mov*, *vel*, *acc*) and angular (*angle*, *res L*) seasonality data relative to those of the control (Ctl) group. Movement parameters in which the amplitude increased in treatment fish relative to controls are indicated in **bold**, whereas those that decreased are in *italics*.



|          |               | Control    | CuSO <sub>4</sub> | Cu-Ctl              | Cu-Ctl             | Neomycin | Neo-Ctl             | Neo-Ctl            | Control  | CuSO <sub>4</sub> | Cu-Ctl                  | Cu-Ctl            | Neomycin | Neo-Ctl                 | Neo-Ctl           |
|----------|---------------|------------|-------------------|---------------------|--------------------|----------|---------------------|--------------------|----------|-------------------|-------------------------|-------------------|----------|-------------------------|-------------------|
| Variable | Dominant Peak | Freq (1/s) | Freq              | $\Delta$ Freq (1/s) | Net Shift Freq 1-3 | Freq     | $\Delta$ Freq (1/s) | Net Shift Freq 1-3 | Power    | Power             | $\Delta$ Power (factor) | Net Shift Pwr 1-3 | Power    | $\Delta$ Power (factor) | Net Shift Pwr 1-3 |
| mov      | 1st           | 0.1567     | 0.1528            | -0.0039             | down               | 0.2118   | 0.0551              | down               | 0.0169   | 0.0448            | <b>2.6475</b>           | up                | 0.0337   | <b>1.9964</b>           | up                |
| mov      | 2nd           | 0.0267     | 0.1042            | 0.0775              | -                  | 0.0139   | -0.0128             | -                  | 0.0101   | 0.0326            | <b>3.2379</b>           | -                 | 0.0139   | <b>1.3814</b>           | -                 |
| mov      | 3rd           | 0.2533     | 0.0208            | -0.2325             | -                  | 0.1632   | -0.0901             | -                  | 0.0082   | 0.0287            | <b>3.5016</b>           | -                 | 0.0129   | <b>1.5777</b>           | -                 |
| vel      | 1st           | 0.2533     | 0.1563            | -0.0971             | down               | 0.2118   | -0.0415             | down               | 1.8444   | 3.1181            | <b>1.6906</b>           | up                | 6.9068   | <b>3.7447</b>           | up                |
| vel      | 2nd           | 1.8444     | 0.2604            | -1.5840             | -                  | 0.4792   | -1.3652             | -                  | 1.5272   | 2.5076            | <b>1.6419</b>           | -                 | 1.4930   | <b>0.9776</b>           | -                 |
| vel      | 3rd           | 0.3100     | 0.2118            | -0.0982             | -                  | 0.1632   | -0.1468             | -                  | 0.7717   | 1.9820            | <b>2.5683</b>           | -                 | 1.3884   | <b>1.7991</b>           | -                 |
| acc      | 1st           | 0.2500     | 0.2604            | 0.0104              | down               | 0.2118   | -0.0382             | down               | 363.7884 | 502.2213          | <b>1.3805</b>           | up                | 938.4990 | <b>2.5798</b>           | up                |
| acc      | 2nd           | 0.4800     | 0.3056            | -0.1744             | -                  | 0.4410   | -0.0390             | -                  | 244.0334 | 402.0855          | <b>1.6477</b>           | -                 | 393.4430 | <b>1.6123</b>           | -                 |
| acc      | 3rd           | 0.3100     | 0.1458            | -0.1642             | -                  | 0.2847   | -0.0253             | -                  | 204.4871 | 304.1066          | <b>1.4872</b>           | -                 | 346.3958 | <b>1.6940</b>           | -                 |
| angle    | 1st           | 0.0400     | 0.0382            | <b>-0.0018</b>      | up                 | 0.0174   | <b>-0.0226</b>      | up                 | 0.0029   | 0.0042            | <b>1.4571</b>           | up                | 0.0040   | <b>1.3874</b>           | up                |
| angle    | 2nd           | 0.0700     | 0.1528            | <b>0.0828</b>       | -                  | 0.1250   | <b>0.0550</b>       | -                  | 0.0026   | 0.0014            | <b>0.5371</b>           | -                 | 0.0028   | <b>1.0712</b>           | -                 |
| angle    | 3rd           | 0.1167     | 0.2083            | <b>0.0917</b>       | -                  | 0.1944   | <b>0.0778</b>       | -                  | 0.0009   | 0.0009            | <b>1.0510</b>           | -                 | 0.0014   | <b>1.6840</b>           | -                 |
| res L    | 1st           | 0.0600     | 0.0313            | -0.0288             | down               | 0.1319   | <b>0.0719</b>       | up                 | 0.0002   | 0.0002            | <b>1.3167</b>           | up                | 0.0001   | 0.4215                  | down              |
| res L    | 2nd           | 0.3433     | 0.0625            | -0.2808             | -                  | 0.2396   | <b>-0.1038</b>      | -                  | 0.0001   | 0.0001            | <b>1.7516</b>           | -                 | 0.0000   | 0.7071                  | -                 |
| res L    | 3rd           | 0.1667     | 0.1319            | -0.0347             | -                  | 0.4097   | <b>0.2431</b>       | -                  | 0.0001   | 0.0001            | <b>1.3909</b>           | -                 | 0.0000   | 0.6849                  | -                 |

**Supplementary Table 10** (based on Fig. 9). The primary, secondary, and tertiary dominant frequencies (*Freq*) of the linear (*mov*, *vel*, *acc*) and angular (*angle*, *res L*) movement power spectra shift up or down ( $\Delta$ *Freq*) in each of the drug treatments (*Cu*, *Neo*) compared to the control (*Ctl*) group. The peak power (*Pwr*) for all dominant frequencies increases ( $+\Delta$ *Pwr*) in nearly all cases. Values for the net shift in frequency and power were determined by adding the values of the +/- relative shift ( $\Delta$ Frequency,  $\Delta$ Power) of all three dominant frequencies and generalizing the overall shift in frequency and power as “up” or “down”. The trend of CuSO<sub>4</sub> and neomycin ablation results in net downshifts in the frequency and net upshift in power of relative movement, velocity and acceleration and a net upshift in the frequency and power of the mean body angle. However, CuSO<sub>4</sub> ablation results in a net downshift in the frequency and net upshift in power, whereas neomycin results in a net upshift in the frequency and net downshift in power. Movement parameters in which the amplitude increased in treatment fish relative to controls are indicated in **bold**, whereas those that decreased are in *italics*.

|                            |                       | Control                  | Control                                      | CuSO <sub>4</sub>        | CuSO <sub>4</sub>                            | Neomycin                 | Neomycin                                     |
|----------------------------|-----------------------|--------------------------|----------------------------------------------|--------------------------|----------------------------------------------|--------------------------|----------------------------------------------|
| Linear parameter reference | Angular parameter CCF | Lag: (+/-) before, after | Heading: right, left<br>Variance: more, less | Lag: (+/-) before, after | Heading: right, left<br>Variance: more, less | Lag: (+/-) before, after | Heading: right, left<br>Variance: more, less |
| movement                   | body angle            | before                   | left                                         | <b>after</b>             | <b>left</b>                                  | <i>after</i>             | <i>right</i>                                 |
| movement                   | resultant length      | before                   | less                                         | <b>before</b>            | <b>less</b>                                  | <i>after</i>             | <i>less</i>                                  |
| velocity                   | body angle            | simultaneous             | right                                        | <i>after</i>             | <i>right</i>                                 | <b>after</b>             | <b>left</b>                                  |
| velocity                   | resultant length      | before                   | less                                         | <i>after</i>             | <i>less</i>                                  | <b>before</b>            | <b>less</b>                                  |
| acceleration               | body angle            | <b>after</b>             | <b>left</b>                                  | <i>after</i>             | <i>right</i>                                 | <b>after</b>             | <b>left</b>                                  |
| acceleration               | resultant length      | <b>before</b>            | <b>less</b>                                  | <i>after</i>             | <i>less</i>                                  | <b>before</b>            | <b>less</b>                                  |

**Supplementary Table 11** (based on Fig. 10). The method, and perhaps mechanism, of lateral line ablation by CuSO<sub>4</sub> and neomycin results in two distinct type of rheotaxis kinematics that are different from control fish. Each method has the opposite effect on the linear and angular movement parameters during rheotaxis and neither matches the phenotype of fish with an intact lateral line. Behavioral phenotypes in which an above average increase in the indicated linear variable was strongly correlated with a leftward heading that will occur later and a decrease in angular variance that occurred previously are indicated in **bold**. Phenotypes in which an above average increase in the indicated linear variable was strongly correlated with a rightward heading and a decrease in angular variance that will occur later are indicated in *italics*.
